# Supplementary material for: Evaluation of the digital diabetes prevention programme pilot: uncontrolled mixed-methods study protocol
Source: PubMed Central journal article supplement — BMJ Open. 2019 May 22;9(5):e025903. doi: 10.1136/bmjopen-2018-025903 (PMC6538049; doi:10.1136/bmjopen-2018-025903), 2019-05-22
Supplement: bmjopen-2018-025903.draft_revisions.pdf [file bmjopen-2018-025903.draft_revisions.pdf]

# BMJ Open

BMJ Open is committed to open peer review. As part of this commitment we make the peer review history of every article we publish publicly available.

When an article is published we post the peer reviewers' comments and the authors' responses online. We also post the versions of the paper that were used during peer review. These are the versions that the peer review comments apply to.

The versions of the paper that follow are the versions that were submitted during the peer review process. They are not the versions of record or the final published versions. They should not be cited or distributed as the published version of this manuscript.

BMJ Open is an open access journal and the full, final, typeset and author-corrected version of record of the manuscript is available on our site with no access controls, subscription charges or pay-per-view fees (<http://bmjopen.bmj.com>).

If you have any questions on BMJ Open's open peer review process please email [info.bmjopen@bmj.com](mailto:info.bmjopen@bmj.com)

# BMJ Open

## Evaluation of the Digital Diabetes Prevention Programme Pilot: Uncontrolled Mixed Methods Study Protocol.

|                               |                                                                                                                                                                                                                                                                                                                                                                                                                                                                                                           |
|-------------------------------|-----------------------------------------------------------------------------------------------------------------------------------------------------------------------------------------------------------------------------------------------------------------------------------------------------------------------------------------------------------------------------------------------------------------------------------------------------------------------------------------------------------|
| Journal:                      | <i>BMJ Open</i>                                                                                                                                                                                                                                                                                                                                                                                                                                                                                           |
| Manuscript ID                 | bmjopen-2018-025903                                                                                                                                                                                                                                                                                                                                                                                                                                                                                       |
| Article Type:                 | Protocol                                                                                                                                                                                                                                                                                                                                                                                                                                                                                                  |
| Date Submitted by the Author: | 07-Aug-2018                                                                                                                                                                                                                                                                                                                                                                                                                                                                                               |
| Complete List of Authors:     | Murray, Elizabeth; University College London, Primary Care and Population Sciences<br>Daff, Kerry; RSM UK Consulting LLP<br>Lavida, Anthi; University College London, Primary Care and Population Health<br>Henley, W; Institute of Health Research, University of Exeter Medical School, College House, St Luke's Campus, Exeter, Devon, UK, EX1 2LU<br>Irwin, Jenny; RSM UK Consulting LLP<br>Valabhji, Jonathan; Imperial College London, Department of Diabetes and Endocrinology, St Mary's Hospital |
| Keywords:                     | DIABETES & ENDOCRINOLOGY, Health policy < HEALTH SERVICES ADMINISTRATION & MANAGEMENT, digital health, PREVENTIVE MEDICINE                                                                                                                                                                                                                                                                                                                                                                                |
|                               |                                                                                                                                                                                                                                                                                                                                                                                                                                                                                                           |

SCHOLARONE™  
Manuscripts

**Title Page****Title: Evaluation of the Digital Diabetes Prevention Programme Pilot: Uncontrolled Mixed Methods Study Protocol.****Authors**

Elizabeth Murray<sup>1</sup>  
Kerry Daff<sup>2</sup>  
Anthi Lavidia<sup>1</sup>  
William Henley<sup>3</sup>  
Jenny Irwin<sup>2</sup>  
Jonathan Valabhji<sup>4</sup>

## Affiliations:

<sup>1</sup>Research Department of Primary Care and Population Health, University College London, Upper Floor 3, Royal Free Hospital, Rowland Hill Street, London NW3 2PF.

<sup>2</sup>RSM UK Consulting LLP  
Number One Lanyon Quay, Belfast, BT1 3LG

<sup>3</sup>Health Statistics Group, Institute of Health Research, University of Exeter Medical School, Exeter EX1 2LU.

<sup>4</sup>National Clinical Director for Obesity and Diabetes, NHS England, Consultant Diabetologist, Imperial College Healthcare NHS Trust.

## Email addresses:

[Elizabeth.murray@ucl.ac.uk](mailto:Elizabeth.murray@ucl.ac.uk)

[Kerry.Daff@rsmuk.com](mailto:Kerry.Daff@rsmuk.com)

[A.lavidia@ucl.ac.uk](mailto:A.lavidia@ucl.ac.uk)

[W.e.henley@exeter.ac.uk](mailto:W.e.henley@exeter.ac.uk)

[Jenny.irwin@rsmuk.com](mailto:Jenny.irwin@rsmuk.com)

[Jonathan.Valabhji@imperial.nhs.uk](mailto:Jonathan.Valabhji@imperial.nhs.uk)

**Corresponding author: Elizabeth Murray**

Word count: 3,759

## Abstract

### Introduction

The prevalence of type 2 diabetes is rising steeply. National Health Service England (NHSE) are exploring the potential of a digital diabetes prevention programme (DDPP) and have commissioned a pilot with embedded evaluation.

### Methods.

**Aim:** to determine: “Whether, and if so, how, should NHSE implement a national digital diabetes prevention programme?”

**Design:** Mixed methods pretest – posttest design, underpinned by theory.

**Theoretical frameworks:** the CALO-RE taxonomy of behaviour change techniques for the digital interventions and the Consolidated Framework of Implementation Research for implementation processes.

**Setting:** Eight pilot areas across England.

**Populations:** people with non-diabetic hyperglycaemia (NDH) (HbA1c 42 – 47 mmol/mol) and people without NDH who are overweight (BMI >25) or obese (BMI >30).

**Intervention:** 5 digitally delivered diabetes prevention interventions.

**Comparator:** This is an uncontrolled study, with no comparator population.

**Outcomes:** The two primary outcomes are reduction in HbA1c (for people with NDH) and reduction in weight (for people who are overweight or obese) at 12 months. Secondary outcomes include use of the intervention, satisfaction, physical activity, patient activation and resources needed for successful implementation.

**Data collection:** Quantitative data will be collected at baseline, 6 months and 12 months by the digital intervention providers. Qualitative data will be collected through semi-structured interviews and focus groups with commissioners, providers, health care professionals and patients.

**Analysis:** Quantitative data will be analysed descriptively and using generalised linear models to determine whether changes in outcomes are associated with demographic and intervention factors. Qualitative data will be analysed using framework analysis, with data pertaining to implementation mapped onto the CFIR.

### Ethics and Dissemination

The study has received ethical approval from the Public Health England Ethics and Research Governance Group (reference R&D 324). Dissemination will include a report to NHSE to inform future policy, and publication in peer reviewed journals.

**Key words:** Diabetes Mellitus, type 2; Health promotion; Primary Prevention; eHealth; internet; Digital Divide; Health Policy.

**Strengths and limitations of this study**

- This will be the first large-scale evaluation of digital diabetes prevention programmes internationally, and will provide data on effectiveness, uptake rates, and on resources required for effective implementation, allowing a realistic determination of potential population impact.
- It benefits from real-world experience and data, providing strong external validity.
- The lack of a comparator or any randomisation means that any changes in outcomes observed during the study cannot be said to be due to the interventions offered. Changes observed may be due to the impact of identification and measurement, the interventions offered, regression to the mean, or some other unmeasured confounder.

## Introduction

Diabetes is a national and international priority for health services, with a steeply rising prevalence. Globally, it affects over 400 million people, or around 9% of the adult population (1), and of these, over 90% have type 2 diabetes (T2DM). There were an estimated 3.7 million people with diabetes in England in 2016 – 17 (2). People with diabetes are at risk of complications including cardiovascular disease, nephropathy, retinopathy and neuropathy. The costs of treating diabetes and its complications are estimated at 10% of the total NHS budget, or some £10 billion per annum (3, 4).

Risk factors for developing T2DM include diet, lack of physical activity, obesity, genetic factors and deprivation. For many people, T2DM is a preventable illness, with prevention focused on the modifiable factors of diet, physical activity and weight. There is high quality international evidence that face-to-face programmes focusing on these three factors can reduce the rate of progression to T2DM in high risk individuals (5-16). To be successful, these programmes appear to require intensive sustained input over a prolonged period of time (7). In light of this evidence National Health Service England (NHSE) launched *Healthier You: The NHS Diabetes Prevention Programme* (NHS DPP) in 2015, initially in seven demonstrator sites, and subsequently rolled out across England. All programmes within the NHS DPP must offer at least 16 hours of face-to-face contact, spread over 13 sessions, with the total programme lasting at least 9 months (17).

NHSE is also considering a national digital diabetes prevention programme (DDPP), and in order to generate the evidence to inform future policy in this area, launched a pilot DDPP in 2017, called "*Healthier You: NHS Diabetes Prevention Programme digital stream*" (18). The rationale for exploring whether a digital DPP can be effective includes:

- Systematic review evidence that digital health interventions can be effective in increasing physical activity, changing diets and promoting weight loss (19-28);
- Face to face programmes, although effective, are costly. In theory, a digital DPP could be rolled out at scale, and if effective, could be more cost-effective;
- Effective face to face programmes require patients to attend a considerable number of sessions, which can be difficult for those people who work or have other commitments in their lives. It is possible that digital interventions could be more easily integrated into busy lifestyles;
- Digital programmes could avoid the perceived stigma of face to face programmes.

However, there is little evidence to support these potential advantages (29), and there are some well documented challenges in the delivery of digital health interventions. These include:

- Problems with engagement and adherence, with many digital health interventions showing low rates of initial uptake as well as high rates of subsequent attrition from the intervention, thus limiting their potential for population impact (30);
- Uncertainty as to how best to improve engagement and adherence – although there are data which suggest that a certain amount of human input, for example in the form of supportive or coaching telephone calls, can improve engagement, the requirement for human input can impact on the scalability and costs of digital health interventions (31-33);
- Concerns around the "digital divide", or the divide between those who do and do not make regular use of digital technology. As those with greatest health need (older people, people with long term health problems, and those with low incomes) are also people who make less use of digital technology (34, 35), there is a real concern that the use of digital health interventions will widen health inequalities (36-38);

- Challenges of implementation, with few examples of successful integration of digital health interventions into routine health care and considerable uncertainty as to how best to achieve such integration.

In the light of this potential, coupled with these major areas of uncertainty, NHS England has decided to run a pilot DDPP, involving 8 demonstrator sites and 5 digital diabetes prevention interventions, with a view to generating the evidence to inform future policy. The main national DPP is being evaluated through an NIHR-funded research programme (DIPLOMA; (39)). The DIPLOMA programme will determine the population impact of the overall programme; this evaluation of the digital pilot focuses only on the population of people referred to the digital programme. This protocol paper reports the proposed evaluation of the DDPP.

### **Aims and objectives**

The overarching aim of this evaluation is to determine:

***“Whether, and if so, how, should NHS England roll out a national digital diabetes prevention programme at the end of the pilot?”***

Subsidiary objectives are to:

1. Determine uptake and use of the digital diabetes prevention interventions by people referred to them through the DDPP;
2. Determine the effects of digital diabetes prevention interventions on people referred to them through the DDPP;
3. Explore the extent to which uptake, use and effects vary across populations, with a view to exploring the potential impact of a DDPP on health inequalities;
4. Explore the extent to which these benefits vary according to differences in key features of the selected digital diabetes prevention interventions;
5. Explore user views about the acceptability of digital diabetes prevention interventions, including perceptions relating to use / non-use and impact on relevant behaviours;
6. Describe the various implementation strategies applied in the 8 demonstrator sites;
7. Determine the costs associated with implementing and delivering a DDPP, from an NHS perspective;
8. Explore commissioner, health care professional and provider views about key factors influencing implementation, uptake, and impact of the digital diabetes prevention interventions.
9. Synthesise these findings into a report to inform future NHS E policy and decision making in this area.

### **Methods.**

**Design:** Mixed methods pretest – posttest design, underpinned by theory.

#### ***Theoretical frameworks:***

This evaluation will be underpinned by two theoretical frameworks: one pertaining to the effectiveness of the digital diabetes prevention intervention (DDPI), and one pertaining to the implementation processes.

1  
2  
3 Understanding the likely and observed effectiveness of the selected DDPI will be promoted  
4 by applying the CALO-RE taxonomy of behaviour change techniques (40) and describing  
5 interventions using the TiDIER framework (41) (Appendix 1).  
6

7 To help with describing and understanding the implementation processes we will use the  
8 Consolidated Framework for Implementation Research (CFIR) (42). This specifies that the  
9 key constructs which determine whether an intervention is successfully implemented or not  
10 are: Intervention characteristics; Outer setting; Inner setting; Individual characteristics; and  
11 the Implementation Process (for details see Appendix 2).  
12

13 **Setting:** the 8 demonstrator sites selected by NHS E. These cover a wide range of  
14 geographies and demographics, including rural, semi-rural, urban and metropolitan areas,  
15 with widely varying proportions of people from Black and Minority Ethnic (BME)  
16 backgrounds, socio-economic status, and pre-existing levels of digital readiness and  
17 engagement with diabetes prevention.  
18

### 19 **Populations and participants:**

20 There were three populations specified by NHS E: (i) people with non-diabetic  
21 hyperglycaemia (NDH), defined as having had a glycated haemoglobin (HbA1c)  
22 measurement of 42 – 47 mmol/mol, or a fasting glucose measurement of 5.5-6.9 mmol/l, in  
23 the 12 months prior to referral; (ii) people who are overweight (Body Mass Index of 25 to <  
24 30) without NDH; and (iii) people who are obese (BMI of 30 or over) without NDH. The  
25 implementation model was such that it was the responsibility of the Local Health Economies  
26 in the demonstrator sites to identify people who fell into these populations, communicate  
27 their risk status to the individuals identified, and refer appropriately to a digital diabetes  
28 prevention intervention.  
29

### 30 **Interventions:**

31 A total of five digital diabetes prevention interventions (DDPI) were selected following a  
32 rigorous, multi-stage selection process undertaken by an independent assessor (Our Mobile  
33 Health) under contract to NHS England. The selection process was as follows:  
34

- 35 • An invitation for applications from digital product manufacturers whose products aim  
36 to prevent Type 2 diabetes in those at high risk was published by Our Mobile Health.  
37 Awareness of the invitation was raised via information through social media, direct  
38 emails, newsletters, and key networks such as the Academic Health Science  
39 Networks in England and the European Union mHealth working group.
- 40 • From 84 applications, 30 products were assessed by the independent assessor as  
41 addressing Type 2 diabetes prevention and as suitable for further review.  
42 The review stage involved completion by product manufacturers of a self-assessment  
43 questionnaire developed over the preceding 2 years under the National Information  
44 Board (NIB) Health Apps and Wearables Work-stream, a collaborative piece of work  
45 involving NHS England, Public Health England, the National Institute of Health and  
46 Care Excellence and the Medicines and Healthcare products Regulatory Agency.  
47 This questionnaire covered the domains of: overview of the service provided by the  
48 digital product; regulation; safety; usability and accessibility; interoperability; privacy,  
49 consent and security; change management; technical stability; indicators of  
50 effectiveness; and pricing (43).
- 51 • This self-assessment step resulted in 14 products assessed as suitable to be taken  
52 to the next stage review where the self-assessments and the products themselves  
53 were reviewed by subject matter experts including behaviour change theory experts,  
54 clinical safety officers, GPs, diabetologists, diabetes specialist nurses and diabetes  
55 specialist dieticians.  
56  
57  
58  
59  
60



- NHS England procured a second partner, RSM, to collaborate in selecting the final 5 products from the 14 assessed by Our Mobile Health, to contract for services with the digital product manufacturers thus selected, and to undertake the programme evaluation. This final selection aimed to achieve a maximum variety sample which varied according to factors known to be important in influencing uptake, use and effectiveness of digital health interventions, namely: the delivery platform (smart phone vs. not); the amount of human interaction to promote uptake; and inclusion (or not) of wearables. Within this, interventions with better pre-existing evidence for uptake, use and effectiveness as well as capabilities and infrastructure to implement at scale, were prioritised.

The interventions will be described according to the TiDIER Framework for describing complex interventions (41) and the CALO-RE Behaviour Change Technique taxonomy (40).

Patients will be referred to the interventions by their health care professionals. This will usually be their GPs (or staff employed by their General Practice), but may be alternative providers contracted to undertake assessment of cardiovascular risk as part of the NHS Health Check Programme, which includes a two stage assessment that aims to identify NDH and undiagnosed Type 2 diabetes (44). Referral forms will include basic demographic and clinical data, including HbA1c and weight recorded in the previous three months to confirm eligibility. Referring health care professionals are responsible for discussing the referral with patients, to ensure patients understand their diagnosis, the type of intervention they are being referred to and the expected benefits.

#### **Outcomes:**

The primary outcomes were pre-specified by NHS England, and were change between baseline and 12 months in HbA1c for the population with NDH and weight for all three populations. Changes over 6 months are considered secondary outcomes.

Secondary and explanatory outcomes have been selected according to our pathway of action model, which posits that the digital diabetes prevention intervention achieves its goal of reducing a user's risk of diabetes by promoting behaviour change, specifically, promoting dietary change and an increase in physical activity. Taken together these behaviour changes result in reduced HbA1c and reduced weight. To achieve these changes requires the user to: register with the intervention; use the intervention; initiate behaviour change; and sustain behaviour change. Effects at each stage will be moderated by intervention factors and by patient factors (see Figure 1). The context and implementation process will also affect the overall population uptake and impact.

Secondary outcomes are listed in Table 1 and include intervention uptake, use and satisfaction; behavioural and clinical outcomes; and costs related to implementation, although it should be noted that a formal health economic analysis was excluded from the brief. Data will be collected at baseline, 6 months and 12 months.

Measures used are the Friends and Family Test (FFT) (45) to measure satisfaction with care, the International Physical Activity Questionnaire (46) to measure physical activity, and the 13 item Patient Activation Measure (PAM-13)(47).

Demographic characteristics are collected at baseline only and will be used as explanatory factors. Demographic data to be collected includes age (date of birth), gender, ethnicity, postcode (to be used for determining socio-economic status by mapping against the Index of Multiple Deprivation (IMD)) and highest level of education attained.

### *Qualitative and explanatory outcomes*

Reasons for observed differences in quantitative outcomes will be explored through qualitative interviews and focus groups. These will be undertaken with a range of stakeholders, including commissioners / leads for the DDPP in selected Local Health Economies (LHE); health care professionals (GPs, practice nurses, diabetes nurses, health care assistants, practice managers); Digital Diabetes Intervention providers; the implementation teams charged with implementing the DDPP in the selected LHE; and patients.

Interviewees will be selected through purposive sampling, aiming for variation across geographical area, digital diabetes intervention provider, disciplinary backgrounds, and areas of high and low uptake.

Interviews will be conducted using semi-structured topic guides, by trained interviewers. The topic guides will vary according to the background of the stakeholder, with the main areas covered summarised in Table 2. Interviews will be undertaken in waves, with Wave 1 taking place during initial implementation and set up, Wave 2 once the programme is well established and Wave 3 toward the end of the pilot.

### **Data collection**

#### *Quantitative data*

The digital diabetes prevention intervention providers are responsible for collecting all quantitative data. Baseline data will be obtained from referral forms and supplemented with data obtained during on boarding interviews with patients. Follow up self-report data (FFT, IPAQ and PAM-13) will be collected online. HbA1c and weights will be measured by the DDPI providers or by patients' General Practices, with the method and site of measurement recorded.

HbA1c measurements may be done on either venous or capillary blood samples, using either registered NHS labs or validated point-of-care testing kits. Whichever measurement process is used at baseline should be used at follow-up. Weights will be recorded using calibrated scales, with patients wearing light indoor clothing.

### **Data Analysis**

#### *Quantitative data*

The baseline characteristics of the three cohorts (NDH, overweight and obese) will be summarised with respect to sociodemographic characteristics, intervention uptake, behavioural and clinical outcomes and economic outcomes. Continuous data will be summarised in terms of the mean, standard deviation, and number of observations or, where skewed, median and interquartile range. Binary/categorical data will be summarised in terms of frequency counts and percentages. Descriptive statistics will also be used to explore differences in baseline characteristics across the 8 demonstrator sites and five DDPIs.

For continuous outcomes, the overall effectiveness of the programme will be assessed in pre-post analyses by comparing the mean outcomes in each cohort from baseline to 6m, and from baseline to 12m (presented with 95% confidence intervals for the estimated change in outcomes). The statistical significance of any changes will be assessed using a paired t-test. For categorical outcomes, pre-post analyses will be conducted using McNemar's test.

1  
2  
3 Multivariable generalised linear models will be used to determine whether changes in  
4 outcomes are associated with demographic factors, adjusting for baseline outcome scores.  
5 Where necessary, continuous outcomes will be transformed to ensure good regression  
6 model fit. Exploratory analysis of the influence of potential mediators will be conducted by  
7 adding variables relating to usage and features of the digital diabetes prevention  
8 interventions to the regression models. Reasons for missing data will be documented and  
9 the baseline characteristics of those with and without missing data compared. The primary  
10 analysis will be based on participants with complete data but we will undertake sensitivity  
11 analyses using various imputation models. No formal adjustment for multiple significance  
12 testing will be applied.

### 13 *Sample size*

14 Target referral and registration numbers were pre-set by NHSE as part of the tender at 3,500  
15 registrations for the NDH population and 1,500 for the overweight / obese population. We  
16 estimated minimum detectable effect sizes at 90% power and a 5% significance level for the  
17 key research questions, given these fixed sample sizes. Assuming a 25% completion rate (at  
18 12 months), it will be possible to detect standardised effect sizes of  $d=0.11$  and  $d=0.17$  when  
19 assessing overall effectiveness in the NDH and overweight/obese groups respectively. This  
20 compares favourably with a weighted mean effect size of  $d=0.22$  (95% CI: 0.20 to 0.23)  
21 estimated in a meta-analysis by Johnson et al (48) for behaviour change interventions  
22 targeting eating and physical activity.  
23

### 24 *Qualitative data*

25 Interviews will be recorded, transcribed verbatim, and anonymised prior to analysis.  
26 Transcripts will be analysed using framework analysis (49) which is well suited to policy-  
27 relevant research, with specific questions and a priori issues. The five steps of framework  
28 analysis are (i) familiarisation; (ii) identifying a thematic framework; (iii) indexing; (iv) charting  
29 and (v) mapping and interpretation. Familiarisation will be achieved by reading and re-  
30 reading transcripts, with an a priori framework based on the Consolidated Framework for  
31 Implementation Research used to index and chart the data. Data that cannot be coded  
32 using CFIR will be noted. Mapping and interpretation will take place in multi-disciplinary data  
33 clinics where interpretations can be proposed, discussed and refined.  
34  
35

### 36 ***Ethics, research governance and data security***

#### 37 *Ethics and Research governance:*

38 Public Health England is the sponsor for this research. Ethical approval has been granted by  
39 the Public Health England Research Ethics and Governance Group, reference R&D 324.  
40  
41  
42

#### 43 *Data security and information governance:*

44 Data will be handled according to the principles of the General Data Protection Regulation  
45 (GDPR), the EU framework for data protection which became law in the UK in May 2018.  
46  
47

48 Quantitative data: the digital diabetes prevention intervention providers will be responsible  
49 for obtaining the quantitative data. No personally identifiable data will be handled by RSM. All  
50 participant data must be pseudonymised by the digital diabetes prevention intervention  
51 provider by assigning each data subject a unique participant identification number (PIN)  
52 upon referral / registration. This PIN will be used to label all individual level participant data  
53 processed by the providers and LHEs over the life of the programme. The PIN will be used  
54 to link baseline, follow-up and usage data for each participant. Digital diabetes prevention  
55 intervention providers will keep a separate database linking PINs with identifiable data.  
56 Postcode mapping for IMD will be undertaken by the LHE (with support from RSM).  
57

1  
2  
3  
4 Qualitative data:

- 5 (i) Patients. Patients will be invited to participate in the interviews via the digital  
6 diabetes prevention providers and / or the local health economies. Patients who  
7 express an interest in being interviewed will be asked to return an expression of  
8 interest form to the RSM team, thus providing implicit consent for sharing  
9 personal contact data. Patients who return an EOI form will be sent full  
10 participant information, including a participant information sheet and a consent  
11 form. Interviews will only be undertaken after completion of a consent form.
- 12 (ii) Health Care Professionals, Commissioners and Providers. RSM have the  
13 contact details for these individuals as RSM are also responsible for the  
14 implementation of the DDPI. These informants will be recruited by RSM through  
15 written (letter or email) invitations to participate. Those who agree will be sent a  
16 participant information sheet and a consent form, and interviews will only take  
17 place after completion of a consent form.

18  
19 Interview tapes will be stored securely on RSM servers. Only anonymised transcripts will be  
20 shared with the evaluation team outside RSM.

21  
22 **Dissemination**

23 Contracted outputs include a 12 month report to the funder, based on 6 month follow up  
24 data, and a final report, based on 12 month follow-up data. The findings will inform the scale  
25 of future provision of digital approaches within the NHS Diabetes Prevention Programme.

26  
27 Academic dissemination will also be undertaken in the form of conference presentations and  
28 publications in peer-reviewed journals. These presentations and publications will require  
29 advance approval from NHS England. Approval will not be unreasonably withheld, but  
30 academic dissemination may have to be delayed till after major policy decisions have been  
31 taken and made public.

32  
33  
34  
35  
36  
37  
38  
39  
40  
41  
42  
43  
44  
45  
46  
47  
48  
49  
50  
51  
52  
53  
54  
55  
56  
57  
58  
59  
60

**Authors' contributions:**

EM and JI developed the initial outline evaluation plan in response to the NHSE tender; this was developed, refined and operationalised by EM, KD, WH and AL. WH led on the statistical analysis plan. EM wrote the first draft of the protocol paper; all authors have read and commented on drafts and have approved the final version.

**Funding statement:** This work was supported by NHS England, as part of the overall contract for implementation and evaluation of the Digital Diabetes Prevention Programme. EM is part-funded by the NIHR School for Primary Care Research and the NIHR Collaboration for Leadership in Applied Health Research and Care, North Thames. AL is funded by the HEE Deanery (North Thames).

**Competing interests statement**

JI is a partner and KD a management consultant at RSM. RSM hold the contract from NHSE to implement and evaluate the Digital Diabetes Prevention Programme. EM and WH receive consultancy fees for their work on the evaluation. EM is Managing Director of a not-for-profit Community Interest Company, HeLP-Digital, which exists to disseminate a digital diabetes self-management programme, HeLP-Diabetes, across the NHS.

peer review only

## Reference List

1. International Diabetes Federation. IDF Diabetes Atlas: 2014 update 2015 [Available from: <http://www.idf.org/diabetesatlas>.
2. Diabetes UK. Diabetes statistics: diabetes prevalence London2017 [Available from: <https://www.diabetes.org.uk/professionals/position-statements-reports/statistics/diabetes-prevalence-2017>.
3. Hex N, Bartlett C, Wright D, Taylor M, Varley D. Estimating the current and future costs of Type 1 and Type 2 diabetes in the UK, including direct health costs and indirect societal and productivity costs. *DiabetMed*. 2012;29(7):855-62.
4. Alva ML, Gray A, Mihaylova B, Leal J, Holman RR. The impact of diabetes-related complications on healthcare costs: new results from the UKPDS (UKPDS 84). *Diabetic medicine : a journal of the British Diabetic Association*. 2015;32(4):459-66.
5. Aguiar EJ, Morgan PJ, Collins CE, Plotnikoff RC, Callister R. Efficacy of interventions that include diet, aerobic and resistance training components for type 2 diabetes prevention: a systematic review with meta-analysis. *The international journal of behavioral nutrition and physical activity*. 2014;11:2.
6. Ali MK, Echouffo-Tcheugui J, Williamson DF. How effective were lifestyle interventions in real-world settings that were modeled on the Diabetes Prevention Program? *Health affairs (Project Hope)*. 2012;31(1):67-75.
7. Ashra NB, Spong R, Carter P, Davies MJ, Dunkley A, Gillies C, et al. A systematic review and meta-analysis assessing the effectiveness of pragmatic lifestyle interventions for the prevention of type 2 diabetes mellitus in routine practice. London; 2015 August 2015. Report No.: PHE publications gateway number: 2015280.
8. Aziz Z, Absetz P, Oldroyd J, Pronk NP, Oldenburg B. A systematic review of real-world diabetes prevention programs: learnings from the last 15 years. *Implementation science : IS*. 2015;10:172.
9. Baker MK, Simpson K, Lloyd B, Bauman AE, Singh MA. Behavioral strategies in diabetes prevention programs: a systematic review of randomized controlled trials. *Diabetes research and clinical practice*. 2011;91(1):1-12.
10. Dunkley AJ, Bodicoat DH, Greaves CJ, Russell C, Yates T, Davies MJ, et al. Diabetes prevention in the real world: effectiveness of pragmatic lifestyle interventions for the prevention of type 2 diabetes and of the impact of adherence to guideline recommendations: a systematic review and meta-analysis. *Diabetes Care*. 2014;37(4):922-33.
11. McCurley JL, Crawford MA, Gallo LC. Prevention of Type 2 Diabetes in U.S. Hispanic Youth: A Systematic Review of Lifestyle Interventions. *Am J Prev Med*. 2017.
12. Neamah HH, Sebert Kuhlmann AK, Tabak RG. Effectiveness of Program Modification Strategies of the Diabetes Prevention Program: A Systematic Review. *Diabetes Educ*. 2016;42(2):153-65.
13. Pronk NP, Remington PL. Combined Diet and Physical Activity Promotion Programs for Prevention of Diabetes: Community Preventive Services Task Force Recommendation Statement. *Annals of internal medicine*. 2015;163(6):465-8.
14. Public Health England. A systematic review and meta-analysis assessing the effectiveness of pragmatic lifestyle interventions for the prevention of type 2 diabetes mellitus in routine practice. London; 2015. Report No.: 2015280.
15. Subramanian K, Midha I, Chellapilla V. Overcoming the Challenges in Implementing Type 2 Diabetes Mellitus Prevention Programs Can Decrease the Burden on Healthcare Costs in the United States. *Journal of diabetes research*. 2017;2017:2615681.
16. Sun Y, You W, Almeida F, Estabrooks P, Davy B. The Effectiveness and Cost of Lifestyle Interventions Including Nutrition Education for Diabetes Prevention: A Systematic Review and Meta-Analysis. *Journal of the Academy of Nutrition and Dietetics*. 2017;117(3):404-21.e36.



17. NHS Diabetes Prevention Programme (NHS DPP): NHS England; [Available from: <https://www.england.nhs.uk/diabetes/diabetes-prevention/>].
18. NHS Diabetes Prevention Programme - Digital stream [Available from: <https://www.england.nhs.uk/diabetes/digital-innovations-to-support-diabetes-outcomes/nhs-diabetes-prevention-programme-digital-stream/>].
19. Harris J, Felix L, Miners A, Murray E, Michie S, Ferguson E, et al. Adaptive e-learning to improve dietary behaviour: a systematic review and cost-effectiveness analysis. *Health technology assessment (Winchester, England)*. 2011;15(37):1-160.
20. Norman GJ, Zabinski MF, Adams MA, Rosenberg DE, Yaroch AL, Atienza AA. A review of eHealth interventions for physical activity and dietary behavior change. *Am J Prev Med*. 2007;33(4):336-45.
21. Afshin A, Babalola D, McLean M, Yu Z, Ma W, Chen CY, et al. Information Technology and Lifestyle: A Systematic Evaluation of Internet and Mobile Interventions for Improving Diet, Physical Activity, Obesity, Tobacco, and Alcohol Use. *Journal of the American Heart Association*. 2016;5(9).
22. Seo DC, Niu J. Evaluation of Internet-Based Interventions on Waist Circumference Reduction: A Meta-Analysis. *J Med Internet Res*. 2015;17(7):e181.
23. Sherrington A, Newham JJ, Bell R, Adamson A, McColl E, Araujo-Soares V. Systematic review and meta-analysis of internet-delivered interventions providing personalized feedback for weight loss in overweight and obese adults. *Obesity reviews : an official journal of the International Association for the Study of Obesity*. 2016;17(6):541-51.
24. Schembre SM, Liao Y, Robertson MC, Dunton GF, Kerr J, Haffey ME, et al. Just-in-Time Feedback in Diet and Physical Activity Interventions: Systematic Review and Practical Design Framework. *J Med Internet Res*. 2018;20(3):e106.
25. Spruijt-Metz D, Wen CK, O'Reilly G, Li M, Lee S, Emken BA, et al. Innovations in the Use of Interactive Technology to Support Weight Management. *Current obesity reports*. 2015;4(4):510-9.
26. Bardus M, Smith JR, Samaha L, Abraham C. Mobile and Web 2.0 interventions for weight management: an overview of review evidence and its methodological quality. *European journal of public health*. 2016;26(4):602-10.
27. Muellmann S, Forberger S, Mollers T, Broring E, Zeeb H, Pischke CR. Effectiveness of eHealth interventions for the promotion of physical activity in older adults: A systematic review. *Prev Med*. 2018;108:93-110.
28. Direito A, Carraca E, Rawstorn J, Whittaker R, Maddison R. mHealth Technologies to Influence Physical Activity and Sedentary Behaviors: Behavior Change Techniques, Systematic Review and Meta-Analysis of Randomized Controlled Trials. *Ann Behav Med*. 2017;51(2):226-39.
29. Joiner KL, Nam S, Whittemore R. Lifestyle interventions based on the diabetes prevention program delivered via eHealth: A systematic review and meta-analysis. *Prev Med*. 2017;100:194-207.
30. Murray E, White IR, Varagunam M, Godfrey C, Khadjesari Z, McCambridge J. Attrition revisited: adherence and retention in a web-based alcohol trial. *Journal of medical Internet research*. 2013;15(8):e162.
31. Yardley L, Spring BJ, Riper H, Morrison LG, Crane DH, Curtis K, et al. Understanding and Promoting Effective Engagement With Digital Behavior Change Interventions. *Am J Prev Med*. 2016;51(5):833-42.
32. McNamee P, Murray E, Kelly MP, Bojke L, Chilcott J, Fischer A, et al. Designing and Undertaking a Health Economics Study of Digital Health Interventions. *American journal of preventive medicine*. 2016.
33. O'Connor S, Hanlon P, O'Donnell CA, Garcia S, Glanville J, Mair FS. Understanding factors affecting patient and public engagement and recruitment to digital health interventions: a systematic review of qualitative studies. *BMC medical informatics and decision making*. 2016;16(1):120.
34. Dutton WH, Blank G, Groselj D. *Cultures of the Internet: The Internet in Britain*. Oxford Internet Survery 2013. Oxford: Oxford Internet Institute; 2013.

- 1  
2  
3 35. Gordon NP, Hornbrook MC. Older adults' readiness to engage with eHealth patient  
4 education and self-care resources: a cross-sectional survey. *BMC health services research*.  
5 2018;18(1):220.
- 6 36. Levy H, Janke AT, Langa KM. Health literacy and the digital divide among older  
7 Americans. *Journal of general internal medicine*. 2015;30(3):284-9.
- 8 37. Estacio EV, Whittle R, Protheroe J. The digital divide: Examining socio-demographic  
9 factors associated with health literacy, access and use of internet to seek health information.  
10 *J Health Psychol*. 2017:1359105317695429.
- 11 38. Latulippe K, Hamel C, Giroux D. Social Health Inequalities and eHealth: A Literature  
12 Review With Qualitative Synthesis of Theoretical and Empirical Studies. *J Med Internet Res*.  
13 2017;19(4):e136.
- 14 39. DIPLOMA - Evaluation of the national NHS Diabetes Prevention Programme  
15 [Available from: [https://www.clahrc-gm.nihr.ac.uk/projects/diploma-evaluation-national-nhs-](https://www.clahrc-gm.nihr.ac.uk/projects/diploma-evaluation-national-nhs-diabetes-prevention-programme)  
16 [diabetes-prevention-programme](https://www.clahrc-gm.nihr.ac.uk/projects/diploma-evaluation-national-nhs-diabetes-prevention-programme)].
- 17 40. Michie S, Ashford S, Sniehotta FF, Dombrowski SU, Bishop A, French DP. A refined  
18 taxonomy of behaviour change techniques to help people change their physical activity and  
19 healthy eating behaviours: The CALO-RE taxonomy. *PsycholHealth*. 2011.
- 20 41. Hoffmann TC, Glasziou PP, Boutron I, Milne R, Perera R, Moher D, et al. Better  
21 reporting of interventions: template for intervention description and replication (TIDieR)  
22 checklist and guide. *BMJ*. 2014;348:g1687.
- 23 42. Damschroder LJ, Aron DC, Keith RE, Kirsh SR, Alexander JA, Lowery JC. Fostering  
24 implementation of health services research findings into practice: a consolidated framework  
25 for advancing implementation science. *ImplementSci*. 2009;4(1):50.
- 26 43. NHS Digital. Health Developer Network. Digital Assessment Questions - Beta  
27 London: NHS Digital 2018 [Available from: <https://developer.nhs.uk/digital-tools/daq/>].
- 28 44. Public Health England. NHS Health Check Best Practice Guidance. London; 2016.  
29 Report No.: 2015710.
- 30 45. NHS England. Friends and family test. Publications Gateway Ref2014.
- 31 46. Craig CL, Marshall AL, Sjöström M, Bauman AE, Booth ML, Ainsworth BE, et al.  
32 International physical activity questionnaire: 12-country reliability and validity. *Med Sci*  
33 *Sports Exerc*. 2003;35.
- 34 47. Hibbard JH, Mahoney ER, Stockard J, Tusler M. Development and testing of a short  
35 form of the patient activation measure. *Health services research*. 2005;40(6 Pt 1):1918-30.
- 36 48. Johnson BT, Scott-Sheldon LA, Carey MP. Meta-synthesis of health behavior change  
37 meta-analyses. *Am J Public Health*. 2010;100(11):2193-8.
- 38 49. Ritchie J, Spencer L. Qualitative data for applied policy research. In: Bryman A,  
39 Burgess R, editors. *Analysing Qualitative Data*. London: Routledge; 1994. p. 173-94.
- 40  
41  
42  
43  
44  
45  
46  
47  
48  
49  
50  
51  
52  
53  
54  
55  
56  
57  
58  
59  
60



**Table 1: Quantitative Outcomes**

|                                                                                | Population      |                    | Time point for collection |    |     |
|--------------------------------------------------------------------------------|-----------------|--------------------|---------------------------|----|-----|
|                                                                                | NDH             | Overweight / Obese | Baseline                  | 6m | 12m |
| <b>Primary Outcome</b>                                                         | HbA1c<br>Weight | Weight             | X                         | X  | X   |
| <b>Secondary outcomes</b>                                                      |                 |                    |                           |    |     |
| <b>Intervention Factors</b>                                                    |                 |                    |                           |    |     |
| Amount of human support planned and delivered (coaching, phone calls, emails). | X               | X                  |                           | X  | X   |
| Numbers referred                                                               | X               | X                  | X                         | X  | X   |
| Numbers registered                                                             | X               | X                  | X                         | X  | X   |
| Numbers who start to use the intervention                                      | X               | X                  | X                         | X  | X   |
| Numbers who complete the intervention                                          | X               | X                  | X                         | X  | X   |
| Usage data for each user                                                       | X               | X                  | X                         | X  | X   |
| Friends and Families Test                                                      | X               | X                  |                           | X  | X   |
| <b>Behavioural and Clinical Outcomes</b>                                       |                 |                    |                           |    |     |
| Height for calculation of BMI                                                  | X               | X                  | X                         |    |     |
| Physical activity (IPAQ)                                                       | X               | X                  | X                         | X  | X   |
| Patient activation (PAM-13).                                                   | X               | X                  | X                         | X  | X   |
| <b>Economic outcomes</b>                                                       |                 |                    |                           |    |     |
| Cost of the digital diabetes prevention intervention                           | X               | X                  | X                         |    |     |
| Types of staff involved in implementation in each LHE                          | X               | X                  | X                         | X  | X   |
| Time spent by each member of staff on implementation of the DDPP (estimated)   | X               | X                  | X                         | X  | X   |
| Additional costs                                                               | X               | X                  | X                         | X  | X   |

**Table 2: Qualitative and explanatory outcomes**

| Stakeholder group                                                               | Main areas of topic guide                                                                                                                                                                                                                                                                                                                                                                                                                                                                                                                                                                                                                                                                                                                                                                                                                                | Time point for collection |        |        |
|---------------------------------------------------------------------------------|----------------------------------------------------------------------------------------------------------------------------------------------------------------------------------------------------------------------------------------------------------------------------------------------------------------------------------------------------------------------------------------------------------------------------------------------------------------------------------------------------------------------------------------------------------------------------------------------------------------------------------------------------------------------------------------------------------------------------------------------------------------------------------------------------------------------------------------------------------|---------------------------|--------|--------|
|                                                                                 |                                                                                                                                                                                                                                                                                                                                                                                                                                                                                                                                                                                                                                                                                                                                                                                                                                                          | Wave 1                    | Wave 2 | Wave 3 |
| Local Health Economies (Commissioners, diabetes leads, health service managers) | <p>About the LHE:</p> <ul style="list-style-type: none"> <li>• Geography, demography and priorities</li> <li>• Culture and organisational style</li> <li>• Rationale for engaging with DDPP (hopes, expectations, fears)</li> </ul> <p>About the DDPI selected</p> <ul style="list-style-type: none"> <li>• How and why this DDPI was selected</li> <li>• Views of the selected intervention</li> </ul> <p>About the implementation plan</p> <ul style="list-style-type: none"> <li>• Describe the implementation plan</li> <li>• Reflections on progress, strengths, weaknesses, amendments proposed or made</li> </ul> <p>Resources required</p> <ul style="list-style-type: none"> <li>• Types and numbers of staff involved</li> <li>• Time per staff member (estimated)</li> <li>• Other costs / resources</li> </ul> <p>Overall lessons learnt</p> | X                         |        |        |
| Health care professionals                                                       | <ul style="list-style-type: none"> <li>• Local geography, demography and clinical priorities</li> <li>• Understanding and prioritisation of DDPP</li> <li>• Views about DDPI in use in local area</li> <li>• Views about potential benefits / harms of DDPP, including impact on health inequalities</li> <li>• Views about implementation process locally</li> <li>• Overall lessons for future national delivery</li> </ul>                                                                                                                                                                                                                                                                                                                                                                                                                            | X                         | X      | X      |
| Digital Diabetes Programme Intervention Providers                               | <ul style="list-style-type: none"> <li>• Describe the intervention</li> <li>• Describe the evidence base for the intervention</li> <li>• Onboarding process</li> <li>• Views on how the implementation is going in participating LHE</li> <li>• Explanations and reflections on reasons for successes / challenges in implementation</li> </ul>                                                                                                                                                                                                                                                                                                                                                                                                                                                                                                          | X                         |        |        |
|                                                                                 |                                                                                                                                                                                                                                                                                                                                                                                                                                                                                                                                                                                                                                                                                                                                                                                                                                                          | X                         | X      | X      |
|                                                                                 |                                                                                                                                                                                                                                                                                                                                                                                                                                                                                                                                                                                                                                                                                                                                                                                                                                                          | X                         | X      | X      |

|          |                                                                                                                                                                                                                                                                                                                                                                                                                                                                                            |   |   |   |
|----------|--------------------------------------------------------------------------------------------------------------------------------------------------------------------------------------------------------------------------------------------------------------------------------------------------------------------------------------------------------------------------------------------------------------------------------------------------------------------------------------------|---|---|---|
|          | <ul style="list-style-type: none"> <li>Views on whether and how this programme could be scaled up nationally</li> <li>Observed usage and impact of intervention on patients, and reasons for these</li> <li>Overall lessons learnt</li> </ul>                                                                                                                                                                                                                                              | X | X | X |
| Patients | <ul style="list-style-type: none"> <li>Knowledge about diabetes and its prevention</li> <li>Relative prioritisation of diabetes prevention</li> <li>Experience of DDPP including identification, referral, onboarding to DDPI, use of DDPI</li> <li>Reasons for use / non use of DDPI</li> <li>Impact of DDPI on lifestyle and health behaviours</li> <li>Preferences for digital vs. face-face</li> <li>Suggestions for improvement</li> <li>Overall views about the programme</li> </ul> |   | X |   |

Figure 1: Theory of change / pathway of action for effects of intervention.

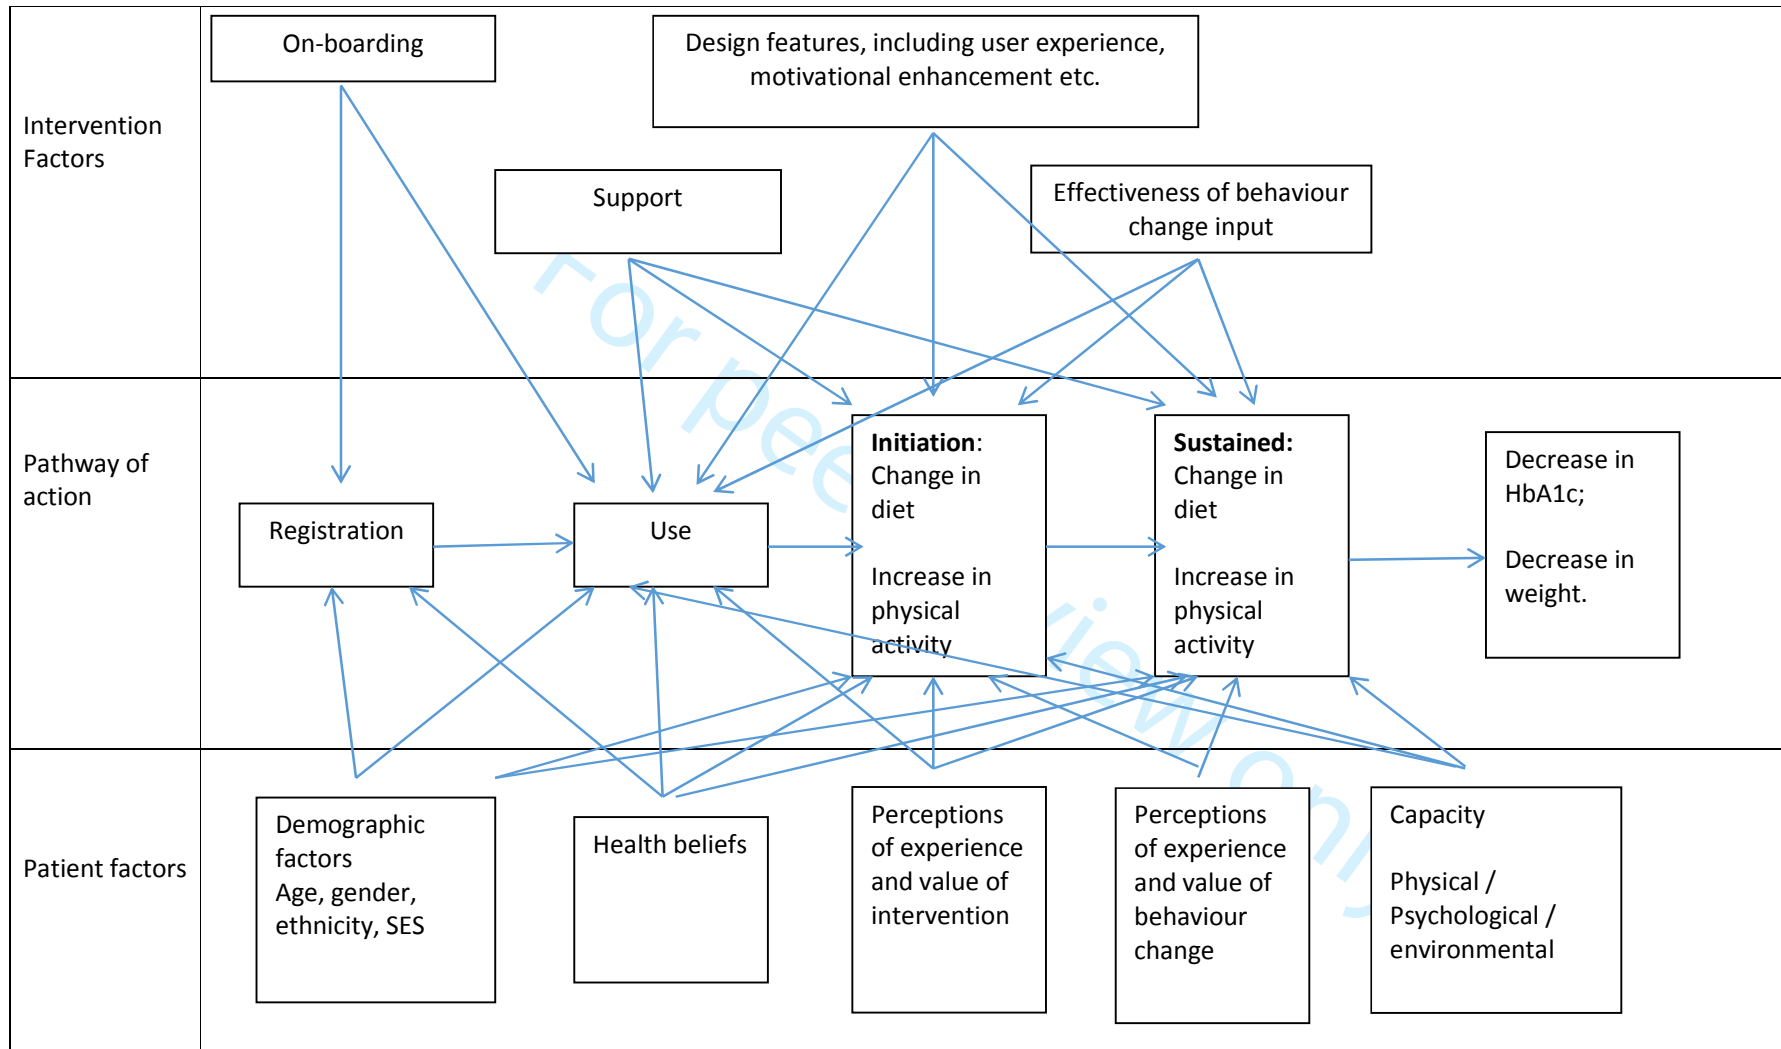

NB; all taking place within different contexts (local health economies) and with different implementation processes.

**Appendix 1: TIDIER check list.**

Items included in the Template for Intervention Description and Replication (TIDieR) checklist: information to include when describing an intervention. Full version of checklist provides space for authors and reviewers to give location of the information

**Item****No****Item****Brief name**

1 Provide the name or a phrase that describes the intervention

**Why**

2 Describe any rationale, theory, or goal of the elements essential to the intervention

**What**

3 **Materials:** Describe any physical or informational materials used in the intervention, including those provided to participants or used in intervention delivery or in training of intervention providers. Provide information on where the materials can be accessed (such as online appendix, URL)

4 **Procedures:** Describe each of the procedures, activities, and/or processes used in the intervention, including any enabling or support activities

**Who provided**

5 For each category of intervention provider (such as psychologist, nursing assistant), describe their expertise, background, and any specific training given

**How**

6 Describe the modes of delivery (such as face to face or by some other mechanism, such as internet or telephone) of the intervention and whether it was provided individually or in a group

**Where**

7 Describe the type(s) of location(s) where the intervention occurred, including any necessary infrastructure or relevant features

**When and How Much**

8 Describe the number of times the intervention was delivered and over what period of time including the number of sessions, their schedule, and their duration, intensity, or dose

**Tailoring**

9 If the intervention was planned to be personalised, titrated or adapted, then describe what, why, when, and how

**Modifications**

10\* If the intervention was modified during the course of the study, describe the changes (what, why, when, and how)

**How well**

11 **Planned:** If intervention adherence or fidelity was assessed, describe how and by whom, and if any strategies were used to maintain or improve fidelity, describe them

12\* **Actual:** If intervention adherence or fidelity was assessed, describe the extent to which the intervention was delivered as planned

\*If checklist is completed for a protocol, these items are not relevant to protocol and cannot be described until study is complete.

## Appendix 2: Key constructs of CFIR

| <b>I. INTERVENTION CHARACTERISTICS</b> |                              |                                                                                                                                                                                                    |
|----------------------------------------|------------------------------|----------------------------------------------------------------------------------------------------------------------------------------------------------------------------------------------------|
| A                                      | Intervention Source          | Perception of key stakeholders about whether the intervention is externally or internally developed.                                                                                               |
| B                                      | Evidence Strength & Quality  | Stakeholders' perceptions of the quality and validity of evidence supporting the belief that the intervention will have desired outcomes.                                                          |
| C                                      | Relative Advantage           | Stakeholders' perception of the advantage of implementing the intervention versus an alternative solution.                                                                                         |
| D                                      | Adaptability                 | The degree to which an intervention can be adapted, tailored, refined, or reinvented to meet local needs.                                                                                          |
| E                                      | Trialability                 | The ability to test the intervention on a small scale in the organization, and to be able to reverse course (undo implementation) if warranted.                                                    |
| F                                      | Complexity                   | Perceived difficulty of implementation, reflected by duration, scope, radicalness, disruptiveness, centrality, and intricacy and number of steps required to implement.                            |
| G                                      | Design Quality & Packaging   | Perceived excellence in how the intervention is bundled, presented, and assembled.                                                                                                                 |
| H                                      | Cost                         | Costs of the intervention and costs associated with implementing the intervention including investment, supply, and opportunity costs.                                                             |
| <b>II. OUTER SETTING</b>               |                              |                                                                                                                                                                                                    |
| A                                      | Patient Needs & Resources    | The extent to which patient needs, as well as barriers and facilitators to meet those needs, are accurately known and prioritized by the organization.                                             |
| B                                      | Cosmopolitanism              | The degree to which an organization is networked with other external organizations.                                                                                                                |
| C                                      | Peer Pressure                | Mimetic or competitive pressure to implement an intervention; typically because most or other key peer or competing organizations have already implemented or are in a bid for a competitive edge. |
| D                                      | External Policy & Incentives | A broad construct that includes external strategies to spread interventions, including policy and regulations (governmental                                                                        |

|                           |                                     |                                                                                                                                                                                                                                                                                                                                                                      |
|---------------------------|-------------------------------------|----------------------------------------------------------------------------------------------------------------------------------------------------------------------------------------------------------------------------------------------------------------------------------------------------------------------------------------------------------------------|
|                           |                                     | or other central entity), external mandates, recommendations and guidelines, pay-for-performance, collaboratives, and public or benchmark reporting.                                                                                                                                                                                                                 |
| <b>III. INNER SETTING</b> |                                     |                                                                                                                                                                                                                                                                                                                                                                      |
| A                         | Structural Characteristics          | The social architecture, age, maturity, and size of an organization.                                                                                                                                                                                                                                                                                                 |
| B                         | Networks & Communications           | The nature and quality of webs of social networks and the nature and quality of formal and informal communications within an organization.                                                                                                                                                                                                                           |
| C                         | Culture                             | Norms, values, and basic assumptions of a given organization.                                                                                                                                                                                                                                                                                                        |
| D                         | Implementation Climate              | The absorptive capacity for change, shared receptivity of involved individuals to an intervention, and the extent to which use of that intervention will be rewarded, supported, and expected within their organization.                                                                                                                                             |
| 1                         | Tension for Change                  | The degree to which stakeholders perceive the current situation as intolerable or needing change.                                                                                                                                                                                                                                                                    |
| 2                         | Compatibility                       | The degree of tangible fit between meaning and values attached to the intervention by involved individuals, how those align with individuals' own norms, values, and perceived risks and needs, and how the intervention fits with existing workflows and systems.                                                                                                   |
| 3                         | Relative Priority                   | Individuals' shared perception of the importance of the implementation within the organization.                                                                                                                                                                                                                                                                      |
| 4                         | Organizational Incentives & Rewards | Extrinsic incentives such as goal-sharing awards, performance reviews, promotions, and raises in salary, and less tangible incentives such as increased stature or respect.                                                                                                                                                                                          |
| 5                         | Goals and Feedback                  | The degree to which goals are clearly communicated, acted upon, and fed back to staff, and alignment of that feedback with goals.                                                                                                                                                                                                                                    |
| 6                         | Learning Climate                    | A climate in which: a) leaders express their own fallibility and need for team members' assistance and input; b) team members feel that they are essential, valued, and knowledgeable partners in the change process; c) individuals feel psychologically safe to try new methods; and d) there is sufficient time and space for reflective thinking and evaluation. |

|                                           |                                             |                                                                                                                                                                                                                       |
|-------------------------------------------|---------------------------------------------|-----------------------------------------------------------------------------------------------------------------------------------------------------------------------------------------------------------------------|
| E                                         | Readiness for Implementation                | Tangible and immediate indicators of organizational commitment to its decision to implement an intervention.                                                                                                          |
| 1                                         | Leadership Engagement                       | Commitment, involvement, and accountability of leaders and managers with the implementation.                                                                                                                          |
| 2                                         | Available Resources                         | The level of resources dedicated for implementation and on-going operations, including money, training, education, physical space, and time.                                                                          |
| 3                                         | Access to Knowledge & Information           | Ease of access to digestible information and knowledge about the intervention and how to incorporate it into work tasks.                                                                                              |
| <b>IV. CHARACTERISTICS OF INDIVIDUALS</b> |                                             |                                                                                                                                                                                                                       |
| A                                         | Knowledge & Beliefs about the Intervention  | Individuals' attitudes toward and value placed on the intervention as well as familiarity with facts, truths, and principles related to the intervention.                                                             |
| B                                         | Self-efficacy                               | Individual belief in their own capabilities to execute courses of action to achieve implementation goals.                                                                                                             |
| C                                         | Individual Stage of Change                  | Characterization of the phase an individual is in, as he or she progresses toward skilled, enthusiastic, and sustained use of the intervention.                                                                       |
| D                                         | Individual Identification with Organization | A broad construct related to how individuals perceive the organization, and their relationship and degree of commitment with that organization.                                                                       |
| E                                         | Other Personal Attributes                   | A broad construct to include other personal traits such as tolerance of ambiguity, intellectual ability, motivation, values, competence, capacity, and learning style.                                                |
| <b>V. PROCESS</b>                         |                                             |                                                                                                                                                                                                                       |
| A                                         | Planning                                    | The degree to which a scheme or method of behavior and tasks for implementing an intervention are developed in advance, and the quality of those schemes or methods.                                                  |
| B                                         | Engaging                                    | Attracting and involving appropriate individuals in the implementation and use of the intervention through a combined strategy of social marketing, education, role modeling, training, and other similar activities. |
| 1                                         | Opinion Leaders                             | Individuals in an organization who have formal or informal influence on the attitudes and beliefs of their colleagues with respect to implementing the intervention.                                                  |



|   |                                                    |                                                                                                                                                                                                                       |
|---|----------------------------------------------------|-----------------------------------------------------------------------------------------------------------------------------------------------------------------------------------------------------------------------|
| 2 | Formally Appointed Internal Implementation Leaders | Individuals from within the organization who have been formally appointed with responsibility for implementing an intervention as coordinator, project manager, team leader, or other similar role.                   |
| 3 | Champions                                          | "Individuals who dedicate themselves to supporting, marketing, and 'driving through' an [implementation]" [101] (p. 182), overcoming indifference or resistance that the intervention may provoke in an organization. |
| 4 | External Change Agents                             | Individuals who are affiliated with an outside entity who formally influence or facilitate intervention decisions in a desirable direction.                                                                           |
| C | Executing                                          | Carrying out or accomplishing the implementation according to plan.                                                                                                                                                   |
| D | Reflecting & Evaluating                            | Quantitative and qualitative feedback about the progress and quality of implementation accompanied with regular personal and team debriefing about progress and experience.                                           |

# BMJ Open

## Evaluation of the Digital Diabetes Prevention Programme Pilot: Uncontrolled Mixed Methods Study Protocol.

|                                 |                                                                                                                                                                                                                                                                                                                                                                                                                                                                                                                                              |
|---------------------------------|----------------------------------------------------------------------------------------------------------------------------------------------------------------------------------------------------------------------------------------------------------------------------------------------------------------------------------------------------------------------------------------------------------------------------------------------------------------------------------------------------------------------------------------------|
| Journal:                        | <i>BMJ Open</i>                                                                                                                                                                                                                                                                                                                                                                                                                                                                                                                              |
| Manuscript ID                   | bmjopen-2018-025903.R1                                                                                                                                                                                                                                                                                                                                                                                                                                                                                                                       |
| Article Type:                   | Protocol                                                                                                                                                                                                                                                                                                                                                                                                                                                                                                                                     |
| Date Submitted by the Author:   | 14-Dec-2018                                                                                                                                                                                                                                                                                                                                                                                                                                                                                                                                  |
| Complete List of Authors:       | Murray, Elizabeth; University College London, Research Department of Primary Care and Population Health<br>Daff, Kerry; RSM UK Consulting LLP<br>Lavida, Anthi; University College London, Primary Care and Population Health<br>Henley, W; Institute of Health Research, University of Exeter Medical School, College House, St Luke's Campus, Exeter, Devon, UK, EX1 2LU<br>Irwin, Jenny; RSM UK Consulting LLP<br>Valabhji, Jonathan; NHS England, Medical Directorate; Imperial College Healthcare NHS Trust, Diabetes and Endocrinology |
| <b>Primary Subject Heading</b>: | Public health                                                                                                                                                                                                                                                                                                                                                                                                                                                                                                                                |
| Secondary Subject Heading:      | Diabetes and endocrinology, General practice / Family practice, Health policy, Health services research                                                                                                                                                                                                                                                                                                                                                                                                                                      |
| Keywords:                       | DIABETES & ENDOCRINOLOGY, Health policy < HEALTH SERVICES ADMINISTRATION & MANAGEMENT, digital health, PREVENTIVE MEDICINE                                                                                                                                                                                                                                                                                                                                                                                                                   |
|                                 |                                                                                                                                                                                                                                                                                                                                                                                                                                                                                                                                              |

SCHOLARONE™  
Manuscripts

## Title Page

**Title: Evaluation of the Digital Diabetes Prevention Programme Pilot: Uncontrolled Mixed Methods Study Protocol.**

## Authors

Elizabeth Murray<sup>1</sup>  
Kerry Daff<sup>2</sup>  
Anthi Lavidia<sup>1</sup>  
William Henley<sup>3</sup>  
Jenny Irwin<sup>2</sup>  
Jonathan Valabhji<sup>4,5</sup>

### Affiliations:

<sup>1</sup>Research Department of Primary Care and Population Health, University College London, Upper Floor 3, Royal Free Hospital, Rowland Hill Street, London NW3 2PF.

<sup>2</sup>RSM UK Consulting LLP  
Number One Lanyon Quay, Belfast, BT1 3LG

<sup>3</sup>Health Statistics Group, Institute of Health Research, University of Exeter Medical School, Exeter EX1 2LU.

<sup>4</sup>Medical Directorate, NHS England, Skipton House, 80 London Road, London SE1 6LH

<sup>5</sup>Imperial College Healthcare NHS Trust and Imperial College London, Department of Diabetes and Endocrinology, 1<sup>st</sup> Floor Mint Wing, St Mary's Hospital, London W2 1NY.

### Email addresses:

[Elizabeth.murray@ucl.ac.uk](mailto:Elizabeth.murray@ucl.ac.uk)

[Kerry.Daff@rsmuk.com](mailto:Kerry.Daff@rsmuk.com)

[A.lavidia@ucl.ac.uk](mailto:A.lavidia@ucl.ac.uk)

[W.e.henley@exeter.ac.uk](mailto:W.e.henley@exeter.ac.uk)

[Jenny.irwin@rsmuk.com](mailto:Jenny.irwin@rsmuk.com)

[Jonathan.Valabhji@nhs.net](mailto:Jonathan.Valabhji@nhs.net)

**Corresponding author: Elizabeth Murray**

Word count: 4,286

## Abstract

### Introduction

The prevalence of type 2 diabetes is rising steeply. National Health Service England (NHSE) are exploring the potential of a digital diabetes prevention programme (DDPP) and have commissioned a pilot with embedded evaluation.

### Methods.

**Aim:** to determine: “Whether, and if so, how, should NHSE implement a national digital diabetes prevention programme?”

**Design:** Mixed methods pretest – posttest design, underpinned by theory.

**Theoretical frameworks:** the CALO-RE taxonomy of behaviour change techniques for the digital interventions and the Consolidated Framework of Implementation Research for implementation processes.

**Setting:** Eight pilot areas across England.

**Populations:** adults with non-diabetic hyperglycaemia (NDH) (HbA1c 42 – 47 mmol/mol, or fasting plasma glucose 5.5-6.9 mmol/l) and adults without NDH who are overweight (BMI >25) or obese (BMI >30).

**Intervention:** 5 digitally delivered diabetes prevention interventions.

**Comparator:** This is an uncontrolled study, with no comparator population.

**Outcomes:** The primary outcomes are reduction in HbA1c and weight (for people with NDH) and reduction in weight (for people who are overweight or obese) at 12 months. Secondary outcomes include use of the intervention, satisfaction, physical activity, patient activation and resources needed for successful implementation.

**Data collection:** Quantitative data will be collected at baseline, 6 months and 12 months by the digital intervention providers. Qualitative data will be collected through semi-structured interviews with commissioners, providers, health care professionals and patients.

**Analysis:** Quantitative data will be analysed descriptively and using generalised linear models to determine whether changes in outcomes are associated with demographic and intervention factors. Qualitative data will be analysed using framework analysis, with data pertaining to implementation mapped onto the CFIR.

### Ethics and Dissemination

The study has received ethical approval from the Public Health England Ethics and Research Governance Group (reference R&D 324). Dissemination will include a report to NHSE to inform future policy, and publication in peer reviewed journals.

**Key words:** Diabetes Mellitus, type 2; Health promotion; Primary Prevention; eHealth; internet; Digital Divide; Health Policy.

### Strengths and limitations of this study

- This will be the first large-scale evaluation of digital diabetes prevention programmes internationally, and will provide data on effectiveness, uptake rates, and on resources required for effective implementation, allowing a realistic determination of potential population impact.
- It benefits from real-world experience and data, providing strong external validity.
- The lack of a comparator or any randomisation means that any changes in outcomes observed during the study cannot be said to be due to the interventions offered. Changes observed may be due to the impact of identification and measurement, the interventions offered, regression to the mean, or some other unmeasured confounder.

For peer review only

## Introduction

Diabetes is a national and international priority for health services, with a steeply rising prevalence. Globally, it affects over 400 million people, or around 9% of the adult population (1), and of these, over 90% have type 2 diabetes (T2DM). There were an estimated 3.7 million people with diabetes in England in 2016 – 17 (2). People with diabetes are at risk of complications including cardiovascular disease, nephropathy, retinopathy and neuropathy. The costs of treating diabetes and its complications are estimated at 10% of the total NHS budget, or some £10 billion per annum (3, 4).

Risk factors for developing T2DM include diet, lack of physical activity, obesity, genetic factors and deprivation. For many people, T2DM is a preventable illness, with prevention focused on the modifiable factors of diet, physical activity and weight. There is high quality international evidence that face-to-face programmes focusing on these three factors can reduce the rate of progression to T2DM in high risk individuals (5-16). To be successful, these programmes appear to require intensive sustained input over a prolonged period of time (7). In light of this evidence National Health Service England (NHSE) launched *Healthier You: The NHS Diabetes Prevention Programme* (NHS DPP) in 2015, initially in seven demonstrator sites, and subsequently rolled out across England. All programmes within the NHS DPP must offer at least 16 hours of face-to-face contact, spread over 13 sessions, with the total programme lasting at least 9 months (17).

NHSE is also considering a national digital diabetes prevention programme (DDPP), and in order to generate the evidence to inform future policy in this area, launched a pilot DDPP in 2017, called "*Healthier You: NHS Diabetes Prevention Programme digital stream*" (18). The reasons cited by NHSE for exploring the potential of a digital DPP are two-fold: firstly, digital delivery may overcome some of the challenges affecting face-to-face programmes; and secondly, systematic review evidence that digital health interventions can be effective in increasing physical activity, changing diets and promoting weight loss (19-28), all behaviours which are effective in preventing type 2 diabetes. Challenges affecting the population impact of face-to-face programmes include problems of acceptability, as their intensive nature may make it difficult for people who work or have other commitments in their lives to attend; and there may be perceived stigma in attending a programme aimed at prevention of type 2 diabetes. Finally, the face to face programmes are costly, particularly when implemented at scale and a digital programme could potentially be easier to deliver at scale and more cost-effective.

However, there is little evidence to support these potential advantages (29), and there are some well documented challenges in the delivery of digital health interventions. Three of the most important of these challenges are problems with engagement and adherence; concerns around the "digital divide"; and well documented problems with implementation. Many digital health interventions show low rates of initial uptake as well as high rates of subsequent attrition from the intervention, which limits their potential for population impact (30). Moreover, there is uncertainty as to how best to improve engagement and adherence – although there are data which suggest that a certain amount of human input, for example in the form of supportive or coaching telephone calls, can improve engagement, the requirement for human input can impact on the scalability and costs of digital health interventions (31-33). There is real concern that the "digital divide" (the divide between those who do and do not make regular use of digital technology) will exacerbate health inequalities, as many of those with greatest health needs (older people, people with long term health problems, and those with low incomes) are also people who make less use of digital technology (34-38). Thirdly, the challenges of successful implementation of digital health interventions are well known (39, 40), with few examples of successful integration of digital health interventions into routine health care and considerable uncertainty as to how best to achieve such integration.

1  
2  
3  
4  
5  
6  
7  
8  
9  
10  
11  
12  
13  
14  
15  
16  
17  
18  
19  
20  
21  
22  
23  
24  
25  
26  
27  
28  
29  
30  
31  
32  
33  
34  
35  
36  
37  
38  
39  
40  
41  
42  
43  
44  
45  
46  
47  
48  
49  
50  
51  
52  
53  
54  
55  
56  
57  
58  
59  
60

In the light of this potential, coupled with these major areas of uncertainty, NHSE commissioned a pilot DDPP with associated evaluation to run alongside the national DPP. In the initial tender document, NHSE specified that the goal of the pilot and associated evaluation was to inform future policy in this area, and as such, the overarching aim of the evaluation was to determine: **“Whether, and if so, how, should NHSE roll out a national digital diabetes prevention programme at the end of the pilot?”** Specific areas of interest were around uptake, use, and impact on weight and glycated haemoglobin; the likely impact of a digital programme on health inequalities; and how the interventions should be integrated into NHS workflows, including determining the resource requirements for successful implementation. Although a formal comparison of the effectiveness of different interventions was out of scope, NHSE were interested in whether specific features of different interventions appeared to be associated with variation in observed uptake, use or impact. The tender specified that a formal health economic analysis was out of scope.

The specific objectives of the evaluation can be grouped into three areas: uptake, use and impact of the interventions; the extent to which uptake, use and impact vary by socio-economic status as an indicator of likely impact on health inequalities; and factors relating to implementation.

Objectives pertaining to uptake, use and impact:

1. Determine uptake and use of the digital diabetes prevention interventions by people referred to them through the DDPP;
2. Determine the effects of digital diabetes prevention interventions on people referred to them through the DDPP;
3. Explore the extent to which these benefits vary according to differences in key features of the selected digital diabetes prevention interventions;
4. Explore user views about the acceptability of digital diabetes prevention interventions, including perceptions relating to use / non-use and impact on relevant behaviours;

Objectives pertaining to health inequalities:

5. Explore the extent to which uptake, use and effects vary by SES;

Objectives pertaining to implementation:

6. Describe the various implementation strategies applied in the 8 demonstrator sites;
7. Determine the costs associated with implementing and delivering a DDPP, from an NHS perspective;
8. Explore commissioner, health care professional and provider views about key factors influencing implementation, uptake, and impact of the digital diabetes prevention interventions.
9. Summarise and synthesise these data in a report which can be used to inform the policy decisions about whether, and if so, how, to roll out a digital diabetes prevention programme across England.

## Methods.

**Design:** Mixed methods pretest – posttest design, underpinned by theory.

### **Theoretical frameworks:**

This evaluation will be underpinned by two theoretical frameworks: one pertaining to the effectiveness of the digital diabetes prevention intervention (DDPI), and one pertaining to the implementation processes.



1  
2  
3  
4 Understanding the likely and observed effectiveness of the selected DDPI will be promoted  
5 by applying the CALO-RE taxonomy of behaviour change techniques (41) and describing  
6 interventions using the TiDIER framework (42) (Appendix 1).  
7

8 To help with describing and understanding the implementation processes we will use the  
9 Consolidated Framework for Implementation Research (CFIR) (43). This specifies that the  
10 key constructs which determine whether an intervention is successfully implemented or not  
11 are: Intervention characteristics; Outer setting; Inner setting; Individual characteristics; and  
12 the Implementation Process (for details see Appendix 2).  
13

#### 14 ***Patient and Public Involvement:***

15 The Board overseeing the NSHE programme in diabetes and diabetes prevention is made  
16 up of a triumvirate of NHSE, Public Health England (PHE), and Diabetes UK (DUK). DUK is  
17 the largest charity representing the voice of people with diabetes in the UK. PPI involvement  
18 in this study was therefore provided by DUK, through their membership of the Board. This  
19 Board determined the how the digital diabetes prevention programme should be piloted and  
20 evaluated, what the requirements for the evaluation were, including overall design (numbers  
21 of demonstrator sites, digital diabetes prevention interventions, pre- post- test design,  
22 primary outcomes and duration of study). The Board also provides oversight of the conduct  
23 and progress of the study and will receive the reports of the study. Hence there was PPI  
24 input into determining the research questions, outcome measures, study design and  
25 dissemination.  
26  
27

#### 28 ***Setting:***

29 Eight demonstrator sites were selected by NHSE in parallel with the selection of the  
30 evaluator team, who had no input into site selection. Sites volunteered to participate in the  
31 digital pilot, and were selected to achieve a range of geographies and demographics,  
32 including rural, semi-rural, urban and metropolitan areas, with widely varying proportions of  
33 people from Black and Minority Ethnic (BME) backgrounds, socio-economic status, and pre-  
34 existing levels of digital readiness and engagement with diabetes prevention.  
35  
36

#### 37 ***Populations and participants:***

38 There were three populations specified by NHSE: (i) adults with non-diabetic  
39 hyperglycaemia (NDH), defined as having had a glycated haemoglobin (HbA1c)  
40 measurement of 42 – 47 mmol/mol, or a fasting glucose measurement of 5.5-6.9 mmol/l, in  
41 the 12 months prior to referral; (ii) adults who are overweight (Body Mass Index of 25 to <  
42 30) without NDH; and (iii) adults who are obese (BMI of 30 or over) without NDH. It is the  
43 responsibility of the 8 demonstrator sites to determine how they will identify people who fell  
44 into these three populations, how GPs and patients will be informed about the programme,  
45 and how patients will be referred to a digital diabetes prevention intervention. In most sites,  
46 patients will be referred to the interventions by their health care professionals, usually their  
47 GPs. In some areas identification and referral may be undertaken by alternative providers  
48 contracted to undertake assessment of cardiovascular risk as part of the NHS Health Check  
49 Programme, which includes a two stage assessment that aims to identify NDH and  
50 undiagnosed Type 2 diabetes (44). Referring health care professionals are responsible for  
51 discussing the referral with patients, to ensure patients understand their diagnosis, the type  
52 of intervention they are being referred to and the expected benefits. Referring health care  
53 professionals are responsible for sending the patient's name and contact details to the  
54 relevant digital diabetes prevention intervention provider; that provider is then responsible for  
55 contacting the patient and onboarding them to the intervention. These processes are  
56 identical to those used in the national face-to-face diabetes prevention programme (45), with  
57 the only difference being that the provider is offering a digital, rather than a face-to-face,  
58 intervention.  
59  
60



### **Interventions:**

A total of five digital diabetes prevention interventions (DDPI) were selected following a multi-stage selection process undertaken by an independent assessor (Our Mobile Health) under contract to NHSE. Following widespread advertising of the opportunity, 84 companies registered an interest and underwent initial screening against six criteria. These were: (i) that the intervention supported behaviour change; (ii) was available by June 2017; (iii) was localised for the English market; (iv) was underpinned by an evidence-based approach; (v) did not require any further integration with existing health IT systems before launching; (vi) had a pricing system in place (although cost itself was not a criterion). 30 providers met these criteria and progressed to a self-assessment exercise which explored 8 criteria: safety; privacy and security; pricing; evidence-base or indicators of effectiveness; usability and accessibility; technical stability; change management; and interoperability. The self-assessment questionnaire can be found at <https://developer.nhs.uk/daq> (46). This led to a shortlist of 14 interventions, which were reviewed by subject matter experts including behaviour change theory experts, clinical safety officers, GPs, diabetologists, diabetes specialist nurses and dieticians. The final sample were selected to vary on factors known to be important in influencing uptake, use and effectiveness of digital health interventions, namely: the delivery platform (smart phone vs. not); the amount of human interaction to promote uptake; and inclusion (or not) of wearables. Within this, interventions with better pre-existing evidence for uptake, use and effectiveness as well as capabilities and infrastructure to implement at scale, were prioritised.

All five interventions focused on dietary intake, weight loss and physical activity, and all interventions set personalised goals and provided feedback on progress toward these goals.

Intervention A (Buddi Nujjer) is a smartphone app, which links to a wristband for monitoring physical activity. The participants log their eating habits and activities via the programme, receive three motivational messages from the app per day, and complete a total of 22 learning modules over the course of the 12-month programme. Onboarding is done by an initial phone call and email for registration. A customer services team is available for those who have technical difficulties, but apart from that, the service is entirely digital.

Intervention B (Hitachi) is smartphone (Android and Apple), tablet and desktop compatible. The solution provides a hybrid of digital and non-digital interactions with a website and a series of phone calls with an experienced health advisor, whose advice follows NHS guidelines. Participants and health advisors set an action plan at the start of the programme. Participants then self-report their outcomes and log their lifestyle on the website to understand their progress against key milestones and objectives. This information goes back to the health advisor team who prompt on guidance and can interact with participants. Health advisors contact participants monthly for the first six months and have one more step-down call at the 8-month mark. Pedometers and scales can be provided on request. Onboarding is done through an initial brief phone call, at which point a longer, goal setting telephone call is arranged.

Intervention C (Liva) is smartphone (Android and Apple), tablet and desktop compatible. There is an initial face to face appointment with a health coach for onboarding and goal setting, followed by 26 coaching sessions with the same coach, delivered weekly for the first 12 weeks and then tapering off in frequency. There is an online peer support group.

Intervention D (Ourpath) is smartphone (Android and Apple), tablet and desktop compatible and includes wireless weighing scales and a wearable activity tracker. Participants are entered into a peer group of up to 10 other people with similar goals who live locally. Groups interact by group messaging, and group targets are set as well as individual ones. The programme has three stages: the 'Core' programme with daily education content received through the app for the first 6 weeks, the 'Sustain' programme with weekly education content

1  
2  
3 until the 6-month mark, and the final 6 months where the user will have completed all the  
4 education modules but still have access to the dietician and group support. Onboarding is  
5 done through two phone calls – an initial introductory one, and a second one to set the  
6 participant up with the programme and group.  
7

8 Intervention E (Oviva) is an app (Android and Apple compatible) with supporting material  
9 (learning materials, podcasts, recipes) delivered through an online portal. For patients  
10 without a smartphone, the content can be delivered via phone calls. The app allows users to  
11 track their activity, weight, and food and drink intake (using a photo food diary). The  
12 programme is a mix of digital and non-digital interactions with a series of phone calls  
13 accompanying the app. The programme is more intense at the start with a weekly phone call  
14 in the first 8 weeks to cover the 16-topic curriculum, tapering to a monthly phone call  
15 thereafter. The phone calls are all conducted by the same dietician who is a specialist  
16 diabetes dietician with at least two years experience. Onboarding is done by the dietician in  
17 the first phone call.  
18  
19

20 The interventions will be described according to the TiDIER Framework for describing  
21 complex interventions (42) and the CALO-RE Behaviour Change Technique taxonomy (41)  
22  
23

### 24 **Outcomes:**

25 The primary outcomes were pre-specified by NHS England, and were change between  
26 baseline and 12 months in HbA1c for the population with NDH and weight for all three  
27 populations. Changes over 6 months are considered secondary outcomes.  
28  
29

30 Secondary and explanatory outcomes have been selected according to our pathway of  
31 action model, which posits that the digital diabetes prevention intervention achieves its goal  
32 of reducing a user's risk of diabetes by promoting behaviour change, specifically, promoting  
33 dietary change and an increase in physical activity. Taken together these behaviour  
34 changes result in reduced HbA1c and reduced weight. To achieve these changes requires  
35 the user to: register with the intervention; use the intervention; initiative behaviour change;  
36 and sustain behaviour change. Effects at each stage will be moderated by intervention  
37 factors and by patient factors (see Figure 1). The context and implementation process will  
38 also affect the overall population uptake and impact.  
39

40 Secondary outcomes are listed in Table 1 and include intervention uptake, use and  
41 satisfaction; behavioural and clinical outcomes; and costs related to implementation,  
42 although it should be noted that a formal health economic analysis was excluded from the  
43 brief. Data will be collected at baseline, 6 months and 12 months.  
44

45 Measures used are the Friends and Family Test (FFT) (47) to measure satisfaction with  
46 care, the International Physical Activity Questionnaire (48) to measure physical activity, and  
47 the 13 item Patient Activation Measure (PAM-13)(49).  
48

49 Demographic characteristics are collected at baseline only and will be used as explanatory  
50 factors. Demographic data to be collected includes age (date of birth), gender, ethnicity,  
51 postcode (to be used for determining socio-economic status by mapping against the Index of  
52 Multiple Deprivation (IMD)) and highest level of education attained.  
53  
54  
55  
56  
57  
58  
59  
60

**Table 1: Quantitative Outcomes**

|                                                                                | Population      |                    | Time point for collection |    |     |
|--------------------------------------------------------------------------------|-----------------|--------------------|---------------------------|----|-----|
|                                                                                | NDH             | Overweight / Obese | Baseline                  | 6m | 12m |
| <b>Primary Outcome</b>                                                         | HbA1c<br>Weight | Weight             | X                         | X  | X   |
| <b>Secondary outcomes</b>                                                      |                 |                    |                           |    |     |
| <b>Intervention Factors</b>                                                    |                 |                    |                           |    |     |
| Amount of human support planned and delivered (coaching, phone calls, emails). | X               | X                  |                           | X  | X   |
| Numbers referred                                                               | X               | X                  | X                         | X  | X   |
| Numbers registered                                                             | X               | X                  | X                         | X  | X   |
| Numbers who start to use the intervention                                      | X               | X                  | X                         | X  | X   |
| Numbers who complete the intervention                                          | X               | X                  | X                         | X  | X   |
| Usage data for each user                                                       | X               | X                  | X                         | X  | X   |
| Friends and Families Test                                                      | X               | X                  |                           | X  | X   |
| <b>Behavioural and Clinical Outcomes</b>                                       |                 |                    |                           |    |     |
| Height for calculation of BMI                                                  | X               | X                  | X                         |    |     |
| Physical activity (IPAQ)                                                       | X               | X                  | X                         | X  | X   |
| Patient activation (PAM-13).                                                   | X               | X                  | X                         | X  | X   |
| <b>Economic outcomes</b>                                                       |                 |                    |                           |    |     |
| Cost of the digital diabetes prevention intervention                           | X               | X                  | X                         |    |     |
| Types of staff involved in implementation in each LHE                          | X               | X                  | X                         | X  | X   |
| Time spent by each member of staff on implementation of the DDPP (estimated)   | X               | X                  | X                         | X  | X   |
| Additional costs                                                               | X               | X                  | X                         | X  | X   |

**Qualitative and explanatory outcomes**

Reasons for observed differences in quantitative outcomes will be explored through qualitative interviews. These will be undertaken with a range of stakeholders, including commissioners / leads for the DDPP in selected Local Health Economies (LHE); health care professionals (GPs, practice nurses, diabetes nurses, health care assistants, practice

managers); Digital Diabetes Intervention providers; the implementation teams charged with implementing the DDPP in the selected LHE; and patients.

Interviewees will be selected through purposive sampling, aiming for variation across geographical area, digital diabetes intervention provider, disciplinary backgrounds, and areas of high and low uptake. Recruitment of interviewees will continue until a) all digital diabetes intervention providers and representatives from each demonstrator site have been interviewed, and b) data saturation is achieved.

Interviews will be conducted using semi-structured topic guides, by trained interviewers, working for RSM. The topic guides will vary according to the background of the stakeholder, with the main areas covered summarised in Table 2. Interviews will be undertaken in waves, with Wave 1 taking place during initial implementation and set up, Wave 2 once the programme is well established and Wave 3 toward the end of the pilot.

**Table 2: Qualitative and explanatory outcomes**

| Stakeholder group                                                               | Main areas of topic guide                                                                                                                                                                                                    | Time point for collection |        |        |
|---------------------------------------------------------------------------------|------------------------------------------------------------------------------------------------------------------------------------------------------------------------------------------------------------------------------|---------------------------|--------|--------|
|                                                                                 |                                                                                                                                                                                                                              | Wave 1                    | Wave 2 | Wave 3 |
| Local Health Economies (Commissioners, diabetes leads, health service managers) | About the LHE: <ul style="list-style-type: none"> <li>• Geography, demography and priorities</li> <li>• Culture and organisational style</li> <li>• Rationale for engaging with DDPP (hopes, expectations, fears)</li> </ul> | X                         |        |        |
|                                                                                 | About the DDPI selected <ul style="list-style-type: none"> <li>• How and why this DDPI was selected</li> <li>• Views of the selected intervention</li> </ul>                                                                 | X                         | X      | X      |
|                                                                                 | About the implementation plan <ul style="list-style-type: none"> <li>• Describe the implementation plan</li> <li>• Reflections on progress, strengths, weaknesses, amendments proposed or made</li> </ul>                    | X                         | X      | X      |
|                                                                                 | Resources required <ul style="list-style-type: none"> <li>• Types and numbers of staff involved</li> <li>• Time per staff member (estimated)</li> <li>• Other costs / resources</li> </ul>                                   | X                         | X      | X      |
|                                                                                 | Overall lessons learnt                                                                                                                                                                                                       |                           |        | X      |
| Health care professionals                                                       | <ul style="list-style-type: none"> <li>• Local geography, demography and clinical priorities</li> </ul>                                                                                                                      | X                         |        |        |
|                                                                                 | <ul style="list-style-type: none"> <li>• Understanding and prioritisation of DDPP</li> </ul>                                                                                                                                 | X                         | X      | X      |
|                                                                                 | <ul style="list-style-type: none"> <li>• Views about DDPI in use in local area</li> </ul>                                                                                                                                    | X                         | X      | X      |

|                                                   |                                                                                                                                                                                                                                                                                                                                                                                                                                                                                                                                            |   |   |   |
|---------------------------------------------------|--------------------------------------------------------------------------------------------------------------------------------------------------------------------------------------------------------------------------------------------------------------------------------------------------------------------------------------------------------------------------------------------------------------------------------------------------------------------------------------------------------------------------------------------|---|---|---|
|                                                   | <ul style="list-style-type: none"> <li>Views about potential benefits / harms of DDPP, including impact on health inequalities</li> <li>Views about implementation process locally</li> <li>Overall lessons for future national delivery</li> </ul>                                                                                                                                                                                                                                                                                        | X | X | X |
| Digital Diabetes Programme Intervention Providers | <ul style="list-style-type: none"> <li>Describe the intervention</li> <li>Describe the evidence base for the intervention</li> <li>Onboarding process</li> <li>Views on how the implementation is going in participating LHE</li> <li>Explanations and reflections on reasons for successes / challenges in implementation</li> <li>Views on whether and how this programme could be scaled up nationally</li> <li>Observed usage and impact of intervention on patients, and reasons for these</li> <li>Overall lessons learnt</li> </ul> | X |   |   |
|                                                   |                                                                                                                                                                                                                                                                                                                                                                                                                                                                                                                                            | X |   |   |
|                                                   |                                                                                                                                                                                                                                                                                                                                                                                                                                                                                                                                            | X | X | X |
|                                                   |                                                                                                                                                                                                                                                                                                                                                                                                                                                                                                                                            | X | X | X |
|                                                   |                                                                                                                                                                                                                                                                                                                                                                                                                                                                                                                                            | X | X | X |
|                                                   |                                                                                                                                                                                                                                                                                                                                                                                                                                                                                                                                            |   | X | X |
|                                                   |                                                                                                                                                                                                                                                                                                                                                                                                                                                                                                                                            |   | X | X |
| Patients                                          | <ul style="list-style-type: none"> <li>Knowledge about diabetes and its prevention</li> <li>Relative prioritisation of diabetes prevention</li> <li>Experience of DDPP including identification, referral, onboarding to DDPI, use of DDPI</li> <li>Reasons for use / non use of DDPI</li> <li>Impact of DDPI on lifestyle and health behaviours</li> <li>Preferences for digital vs. face-face</li> <li>Suggestions for improvement</li> <li>Overall views about the programme</li> </ul>                                                 |   | X |   |
|                                                   |                                                                                                                                                                                                                                                                                                                                                                                                                                                                                                                                            |   | X |   |
|                                                   |                                                                                                                                                                                                                                                                                                                                                                                                                                                                                                                                            |   | X |   |
|                                                   |                                                                                                                                                                                                                                                                                                                                                                                                                                                                                                                                            |   | X |   |
|                                                   |                                                                                                                                                                                                                                                                                                                                                                                                                                                                                                                                            |   | X |   |
|                                                   |                                                                                                                                                                                                                                                                                                                                                                                                                                                                                                                                            |   | X |   |
|                                                   |                                                                                                                                                                                                                                                                                                                                                                                                                                                                                                                                            |   | X |   |
|                                                   |                                                                                                                                                                                                                                                                                                                                                                                                                                                                                                                                            |   | X |   |

### **Data collection**

Referral forms will include basic demographic and clinical data, including HbA1c and weight recorded in the previous three months to confirm eligibility.

### **Quantitative data**

The digital diabetes prevention intervention providers are responsible for collecting all quantitative data. Baseline data will be obtained from referral forms and supplemented with

1  
2  
3 data obtained during on boarding interviews with patients. Follow up self-report data (FFT,  
4 IPAQ and PAM-13) will be collected online. HbA1c and weights will be measured by the  
5 DDPI providers or by patients' General Practices, with the method and site of measurement  
6 recorded.  
7

8 HbA1c measurements may be done on either venous or capillary blood samples, using  
9 either registered NHS labs or validated point-of-care testing kits. Whichever measurement  
10 process is used at baseline should be used at follow-up. Weights will be recorded using  
11 calibrated scales, with patients wearing light indoor clothing.  
12

## 13 **Data Analysis**

### 14 *Quantitative data*

15 The baseline characteristics of the three cohorts (NDH, overweight and obese) will be  
16 summarised with respect to sociodemographic characteristics, intervention uptake,  
17 behavioural and clinical outcomes and economic outcomes. Continuous data will be  
18 summarised in terms of the mean, standard deviation, and number of observations or, where  
19 skewed, median and interquartile range. Binary/categorical data will be summarised in terms  
20 of frequency counts and percentages. Descriptive statistics will also be used to explore  
21 differences in baseline characteristics across the 8 demonstrator sites and five DDPIs.  
22

23 For continuous outcomes, the overall effectiveness of the programme will be assessed in  
24 pre-post analyses by comparing the mean outcomes in each cohort from baseline to 6m,  
25 and from baseline to 12m (presented with 95% confidence intervals for the estimated  
26 change in outcomes). The statistical significance of any changes will be assessed using a  
27 paired t-test. For categorical outcomes, pre-post analyses will be conducted using  
28 McNemar's test.  
29

30 Multivariable generalised linear models will be used to determine whether changes in  
31 outcomes are associated with demographic factors, adjusting for baseline outcome scores.  
32 Where necessary, continuous outcomes will be transformed to ensure good regression  
33 model fit. Exploratory analysis of the influence of potential mediators will be conducted by  
34 adding variables relating to usage and features of the digital diabetes prevention  
35 interventions to the regression models. The potential for clustering effects by demonstrator  
36 site will be considered by inclusion of random effects for the demonstrator site in the  
37 generalised linear models. Three level models accounting for clustering by GP practice  
38 within demonstrator sites will also be explored.  
39

40 Reasons for missing data will be documented and the baseline characteristics of those with  
41 and without missing data compared. The primary analysis will be based on participants with  
42 complete data but we will undertake sensitivity analyses using various imputation models.  
43 The potential for bias due to non-random attrition will be addressed by fitting a propensity  
44 score model to account for drop-out on the basis of baseline characteristics and then using  
45 inverse probability weighting (IPW) based on the propensity score to fit the treatment  
46 effectiveness model (50). No formal adjustment for multiple significance testing will be  
47 applied.  
48  
49  
50  
51

### 52 *Sample size*

53 Target referral and registration numbers were pre-set by NHSE as part of the tender at 3,500  
54 registrations for the NDH population and 1,500 for the overweight / obese population. We  
55 estimated minimum detectable effect sizes at 90% power and a 5% significance level for the  
56 key research questions, given these fixed sample sizes. Assuming a 25% completion rate (at  
57 12 months), it will be possible to detect standardised effect sizes of  $d=0.11$  and  $d=0.17$  when  
58 assessing overall effectiveness in the NDH and overweight/obese groups respectively,  
59  
60



1  
2  
3 assuming clustering is ignorable. This compares favourably with a weighted mean effect size  
4 of  $d=0.22$  (95% CI: 0.20 to 0.23) estimated in a meta-analysis by Johnson et al (51) for  
5 behaviour change interventions targeting eating and physical activity. Further power analysis  
6 allowing for clustering effects by demonstrator site (with an intraclass correlation coefficient  
7 (ICC) of 0.02 based on a median estimate of 0.0185 in a study of ICCs in adults with  
8 diabetes in primary care practices(52)) gave minimum detectable effect sizes of  $d=0.18$  and  
9 0.22 in the NDH and overweight/obese groups respectively, assuming a 25% completion  
10 rate at 12 months.  
11

### 12 *Qualitative data*

13 Interviews will be recorded, transcribed verbatim, and anonymised prior to analysis.  
14 Transcripts will be analysed using framework analysis (53) which is well suited to policy-  
15 relevant research, with specific questions and a priori issues. The five steps of framework  
16 analysis are (i) familiarisation; (ii) identifying a thematic framework; (iii) indexing; (iv) charting  
17 and (v) mapping and interpretation. Familiarisation will be achieved by reading and re-  
18 reading transcripts, with an a priori framework based on the Consolidated Framework for  
19 Implementation Research used to index and chart the data. Data that cannot be coded  
20 using CFIR will be noted. Mapping and interpretation will take place in multi-disciplinary data  
21 clinics where interpretations can be proposed, discussed and refined.  
22  
23  
24  
25

### 26 ***Ethics, research governance and data security***

#### 27 *Ethics and Research governance:*

28 Public Health England is the sponsor for this research. Ethical approval has been granted by  
29 the Public Health England Research Ethics and Governance Group, reference R&D 324.  
30  
31

#### 32 *Data security and information governance:*

33 Data will be handled according to the principles of the General Data Protection Regulation  
34 (GDPR), the EU framework for data protection which became law in the UK in May 2018.  
35  
36

37 Quantitative data: the digital diabetes prevention intervention providers will be responsible  
38 for obtaining the quantitative data. No personally identifiable data will be handled by RSM. All  
39 participant data must be pseudonymised by the digital diabetes prevention intervention  
40 provider by assigning each data subject a unique participant identification number (PIN)  
41 upon referral / registration. This PIN will be used to label all individual level participant data  
42 processed by the providers and LHEs over the life of the programme. The PIN will be used  
43 to link baseline, follow-up and usage data for each participant. Digital diabetes prevention  
44 intervention providers will keep a separate database linking PINs with identifiable data.  
45 Postcode mapping for IMD will be undertaken by the LHE (with support from RSM).  
46  
47

#### 48 Qualitative data:

- 49 (i) Patients. Patients will be invited to participate in the interviews via the digital diabetes  
50 prevention providers and / or the local health economies. Patients who express an  
51 interest in being interviewed will be asked to return an expression of interest form to  
52 the RSM team, thus providing implicit consent for sharing personal contact data.  
53 Patients who return an EOI form will be sent full participant information, including a  
54 participant information sheet and a consent form. Interviews will only be undertaken  
55 after completion of a consent form.  
56  
57 (ii) Health Care Professionals, Commissioners and Providers. RSM have the contact  
58 details for these individuals as RSM are also responsible for the implementation of  
59 the DDPI. These informants will be recruited by RSM through written (letter or email)  
60 invitations to participate. Those who agree will be sent a participant information

1  
2  
3 sheet and a consent form, and interviews will only take place after completion of a  
4 consent form.  
5

6 Interview tapes will be stored securely on RSM servers. Only anonymised transcripts will be  
7 shared with the evaluation team outside RSM.  
8

### 9 **Dissemination**

10 Contracted outputs include a 12 month report to the funder, based on 6 month follow up  
11 data, and a final report, based on 12 month follow-up data. The findings will inform the scale  
12 of future provision of digital approaches within the NHS Diabetes Prevention Programme.  
13

14 Academic dissemination will also be undertaken in the form of conference presentations and  
15 publications in peer-reviewed journals. These presentations and publications will require  
16 advance approval from NHS England. Approval will not be unreasonably withheld, but  
17 academic dissemination may have to be delayed till after major policy decisions have been  
18 taken and made public.  
19

### 20 **Authors' contributions:**

21  
22 EM and JI developed the initial outline evaluation plan in response to the NHSE tender; this  
23 was developed, refined and operationalised by EM, KD, WH and AL. WH led on the  
24 statistical analysis plan. JV chairs the NHSE Programme Board which developed and  
25 oversaw the tender. EM wrote the first draft of the protocol paper; all authors have read and  
26 commented on drafts and have approved the final version. PPI involvement was provided by  
27 Diabetes UK membership of the Board overseeing this work.  
28  
29

30 **Funding statement:** This work was supported by NHS England, as part of the overall  
31 contract for implementation and evaluation of the Digital Diabetes Prevention Programme.  
32 EM is part-funded by the NIHR School for Primary Care Research and the NIHR  
33 Collaboration for Leadership in Applied Health Research and Care, North Thames. AL is  
34 funded by the HEE Deanery (North Thames).  
35  
36

### 37 **Competing interests statement**

38 JI is a partner and KD a management consultant at RSM. RSM hold the contract from  
39 NHSE to implement and evaluate the Digital Diabetes Prevention Programme. EM and WH  
40 receive consultancy fees for their work on the evaluation. EM is Managing Director of a not-  
41 for-profit Community Interest Company, HeLP-Digital, which exists to disseminate a digital  
42 diabetes self-management programme, HeLP-Diabetes, across the NHS. JV is the National  
43 Clinical Director for Diabetes and Obesity at NHS England.  
44  
45  
46  
47  
48  
49  
50  
51  
52  
53  
54  
55  
56  
57  
58  
59  
60



## Reference List

1. Federation ID. IDF Diabetes Atlas: 2014 update 2015 [Available from: <http://www.idf.org/diabetesatlas>].
2. UK D. Diabetes statistics: diabetes prevalence London2017 [Available from: <https://www.diabetes.org.uk/professionals/position-statements-reports/statistics/diabetes-prevalence-2017>].
3. Hex N, Bartlett C, Wright D, Taylor M, Varley D. Estimating the current and future costs of Type 1 and Type 2 diabetes in the UK, including direct health costs and indirect societal and productivity costs. *DiabetMed*. 2012;29(7):855-62.
4. Alva ML, Gray A, Mihaylova B, Leal J, Holman RR. The impact of diabetes-related complications on healthcare costs: new results from the UKPDS (UKPDS 84). *Diabetic medicine : a journal of the British Diabetic Association*. 2015;32(4):459-66.
5. Aguiar EJ, Morgan PJ, Collins CE, Plotnikoff RC, Callister R. Efficacy of interventions that include diet, aerobic and resistance training components for type 2 diabetes prevention: a systematic review with meta-analysis. *The international journal of behavioral nutrition and physical activity*. 2014;11:2.
6. Ali MK, Echouffo-Tcheugui J, Williamson DF. How effective were lifestyle interventions in real-world settings that were modeled on the Diabetes Prevention Program? *Health affairs (Project Hope)*. 2012;31(1):67-75.
7. Ashra NB, Spong R, Carter P, Davies MJ, Dunkley A, Gillies C, et al. A systematic review and meta-analysis assessing the effectiveness of pragmatic lifestyle interventions for the prevention of type 2 diabetes mellitus in routine practice. London; 2015 August 2015. Report No.: PHE publications gateway number: 2015280.
8. Aziz Z, Absetz P, Oldroyd J, Pronk NP, Oldenburg B. A systematic review of real-world diabetes prevention programs: learnings from the last 15 years. *Implementation science : IS*. 2015;10:172.
9. Baker MK, Simpson K, Lloyd B, Bauman AE, Singh MA. Behavioral strategies in diabetes prevention programs: a systematic review of randomized controlled trials. *Diabetes research and clinical practice*. 2011;91(1):1-12.
10. Dunkley AJ, Bodicoat DH, Greaves CJ, Russell C, Yates T, Davies MJ, et al. Diabetes prevention in the real world: effectiveness of pragmatic lifestyle interventions for the prevention of type 2 diabetes and of the impact of adherence to guideline recommendations: a systematic review and meta-analysis. *Diabetes Care*. 2014;37(4):922-33.
11. McCurley JL, Crawford MA, Gallo LC. Prevention of Type 2 Diabetes in U.S. Hispanic Youth: A Systematic Review of Lifestyle Interventions. *Am J Prev Med*. 2017.
12. Neamah HH, Sebert Kuhlmann AK, Tabak RG. Effectiveness of Program Modification Strategies of the Diabetes Prevention Program: A Systematic Review. *Diabetes Educ*. 2016;42(2):153-65.
13. Pronk NP, Remington PL. Combined Diet and Physical Activity Promotion Programs for Prevention of Diabetes: Community Preventive Services Task Force Recommendation Statement. *Annals of internal medicine*. 2015;163(6):465-8.
14. Public Health England. A systematic review and meta-analysis assessing the effectiveness of pragmatic lifestyle interventions for the prevention of type 2 diabetes mellitus in routine practice. London; 2015. Report No.: 2015280.
15. Subramanian K, Midha I, Chellapilla V. Overcoming the Challenges in Implementing Type 2 Diabetes Mellitus Prevention Programs Can Decrease the Burden on Healthcare Costs in the United States. *Journal of diabetes research*. 2017;2017:2615681.
16. Sun Y, You W, Almeida F, Estabrooks P, Davy B. The Effectiveness and Cost of Lifestyle Interventions Including Nutrition Education for Diabetes Prevention: A Systematic Review and Meta-Analysis. *Journal of the Academy of Nutrition and Dietetics*. 2017;117(3):404-21.e36.

17. NHS Diabetes Prevention Programme (NHS DPP): NHS England; [Available from: <https://www.england.nhs.uk/diabetes/diabetes-prevention/>].
18. NHS Diabetes Prevention Programme - Digital stream [Available from: <https://www.england.nhs.uk/diabetes/digital-innovations-to-support-diabetes-outcomes/nhs-diabetes-prevention-programme-digital-stream/>].
19. Harris J, Felix L, Miners A, Murray E, Michie S, Ferguson E, et al. Adaptive e-learning to improve dietary behaviour: a systematic review and cost-effectiveness analysis. *Health technology assessment (Winchester, England)*. 2011;15(37):1-160.
20. Norman GJ, Zabinski MF, Adams MA, Rosenberg DE, Yaroch AL, Atienza AA. A review of eHealth interventions for physical activity and dietary behavior change. *Am J Prev Med*. 2007;33(4):336-45.
21. Afshin A, Babalola D, McLean M, Yu Z, Ma W, Chen CY, et al. Information Technology and Lifestyle: A Systematic Evaluation of Internet and Mobile Interventions for Improving Diet, Physical Activity, Obesity, Tobacco, and Alcohol Use. *Journal of the American Heart Association*. 2016;5(9).
22. Seo DC, Niu J. Evaluation of Internet-Based Interventions on Waist Circumference Reduction: A Meta-Analysis. *J Med Internet Res*. 2015;17(7):e181.
23. Sherrington A, Newham JJ, Bell R, Adamson A, McColl E, Araujo-Soares V. Systematic review and meta-analysis of internet-delivered interventions providing personalized feedback for weight loss in overweight and obese adults. *Obesity reviews : an official journal of the International Association for the Study of Obesity*. 2016;17(6):541-51.
24. Schembre SM, Liao Y, Robertson MC, Dunton GF, Kerr J, Haffey ME, et al. Just-in-Time Feedback in Diet and Physical Activity Interventions: Systematic Review and Practical Design Framework. *J Med Internet Res*. 2018;20(3):e106.
25. Spruijt-Metz D, Wen CK, O'Reilly G, Li M, Lee S, Emken BA, et al. Innovations in the Use of Interactive Technology to Support Weight Management. *Current obesity reports*. 2015;4(4):510-9.
26. Bardus M, Smith JR, Samaha L, Abraham C. Mobile and Web 2.0 interventions for weight management: an overview of review evidence and its methodological quality. *European journal of public health*. 2016;26(4):602-10.
27. Muellmann S, Forberger S, Mollers T, Broring E, Zeeb H, Pischke CR. Effectiveness of eHealth interventions for the promotion of physical activity in older adults: A systematic review. *Prev Med*. 2018;108:93-110.
28. Direito A, Carraca E, Rawstorn J, Whittaker R, Maddison R. mHealth Technologies to Influence Physical Activity and Sedentary Behaviors: Behavior Change Techniques, Systematic Review and Meta-Analysis of Randomized Controlled Trials. *Ann Behav Med*. 2017;51(2):226-39.
29. Joiner KL, Nam S, Whittemore R. Lifestyle interventions based on the diabetes prevention program delivered via eHealth: A systematic review and meta-analysis. *Prev Med*. 2017;100:194-207.
30. Murray E, White IR, Varagunam M, Godfrey C, Khadjesari Z, McCambridge J. Attrition revisited: adherence and retention in a web-based alcohol trial. *J Med Internet Res*. 2013;15(8):e162.
31. Yardley L, Spring BJ, Riper H, Morrison LG, Crane DH, Curtis K, et al. Understanding and Promoting Effective Engagement With Digital Behavior Change Interventions. *Am J Prev Med*. 2016;51(5):833-42.
32. McNamee P, Murray E, Kelly MP, Bojke L, Chilcott J, Fischer A, et al. Designing and Undertaking a Health Economics Study of Digital Health Interventions. *American Journal of Preventive Medicine*. 2016.
33. O'Connor S, Hanlon P, O'Donnell CA, Garcia S, Glanville J, Mair FS. Understanding factors affecting patient and public engagement and recruitment to digital health interventions: a systematic review of qualitative studies. *BMC medical informatics and decision making*. 2016;16(1):120.
34. Dutton WH, Blank G, Groselj D. *Cultures of the Internet: The Internet in Britain. Oxford Internet Survey 2013*. Oxford: Oxford Internet Institute; 2013.

- 1
- 2
- 3
- 4 35. Gordon NP, Hornbrook MC. Older adults' readiness to engage with eHealth patient
- 5 education and self-care resources: a cross-sectional survey. *BMC health services research*.
- 6 2018;18(1):220.
- 7 36. Levy H, Janke AT, Langa KM. Health literacy and the digital divide among older
- 8 Americans. *Journal of general internal medicine*. 2015;30(3):284-9.
- 9 37. Estacio EV, Whittle R, Protheroe J. The digital divide: Examining socio-demographic
- 10 factors associated with health literacy, access and use of internet to seek health information.
- 11 *J Health Psychol*. 2017:1359105317695429.
- 12 38. Latulippe K, Hamel C, Giroux D. Social Health Inequalities and eHealth: A Literature
- 13 Review With Qualitative Synthesis of Theoretical and Empirical Studies. *J Med Internet Res*.
- 14 2017;19(4):e136.
- 15 39. Wachter RM. Making IT Work: Harnessing the Power of HealthInformation
- 16 Technology to Improve Care in England. Report of the National Advisory Group on Health
- 17 Information Technology in England. London: Department of Health and Social Care; 2016.
- 18 40. Ross J, Stevenson F, Lau R, Murray E. Factors that influence the implementation of
- 19 e-Health: A systematic review of systematic reviews (an update). *Implementation science* :
- 20 IS. 2016.
- 21 41. Michie S, Ashford S, Sniehotta FF, Dombrowski SU, Bishop A, French DP. A refined
- 22 taxonomy of behaviour change techniques to help people change their physical activity and
- 23 healthy eating behaviours: The CALO-RE taxonomy. *PsycholHealth*. 2011.
- 24 42. Hoffmann TC, Glasziou PP, Boutron I, Milne R, Perera R, Moher D, et al. Better
- 25 reporting of interventions: template for intervention description and replication (TIDieR)
- 26 checklist and guide. *BMJ*. 2014;348:g1687.
- 27 43. Damschroder LJ, Aron DC, Keith RE, Kirsh SR, Alexander JA, Lowery JC. Fostering
- 28 implementation of health services research findings into practice: a consolidated framework
- 29 for advancing implementation science. *ImplementSci*. 2009;4(1):50.
- 30 44. England PH. NHS Health Check Best Practice Guidance. London; 2016. Report No.:
- 31 2015710.
- 32 45. Barron E, Clark R, Hewings R, Smith J, Valabhji J. Progress of the Healthier You:
- 33 NHS Diabetes Prevention Programme: referrals, uptake and participant characteristics.
- 34 *Diabetic medicine : a journal of the British Diabetic Association*. 2018;35(4):513-8.
- 35 46. Digital N. Health Developer Network. Digital Assessment Questions - Beta London:
- 36 NHS Digital 2018 [Available from: <https://developer.nhs.uk/digital-tools/daq/>].
- 37 47. England N. Friends and family test. Publications Gateway Ref2014.
- 38 48. Craig CL, Marshall AL, Sjöström M, Bauman AE, Booth ML, Ainsworth BE, et al.
- 39 International physical activity questionnaire: 12-country reliability and validity. *Med Sci*
- 40 *Sports Exerc*. 2003;35.
- 41 49. Hibbard JH, Mahoney ER, Stockard J, Tusler M. Development and testing of a short
- 42 form of the patient activation measure. *Health services research*. 2005;40(6 Pt 1):1918-30.
- 43 50. Cole SR, Hernan MA. Constructing inverse probability weights for marginal structural
- 44 models. *American journal of epidemiology*. 2008;168(6):656-64.
- 45 51. Johnson BT, Scott-Sheldon LA, Carey MP. Meta-synthesis of health behavior change
- 46 meta-analyses. *Am J Public Health*. 2010;100(11):2193-8.
- 47 52. Littenberg B, MacLean CD. Intra-cluster correlation coefficients in adults with
- 48 diabetes in primary care practices: the Vermont Diabetes Information System field survey.
- 49 *BMC medical research methodology*. 2006;6:20.
- 50 53. Ritchie J, Spencer L. Qualitative data for applied policy research. In: Bryman A,
- 51 Burgess R, editors. *Analysing Qualitative Data*. London: Routledge; 1994. p. 173-94.
- 52
- 53
- 54
- 55
- 56
- 57
- 58
- 59
- 60

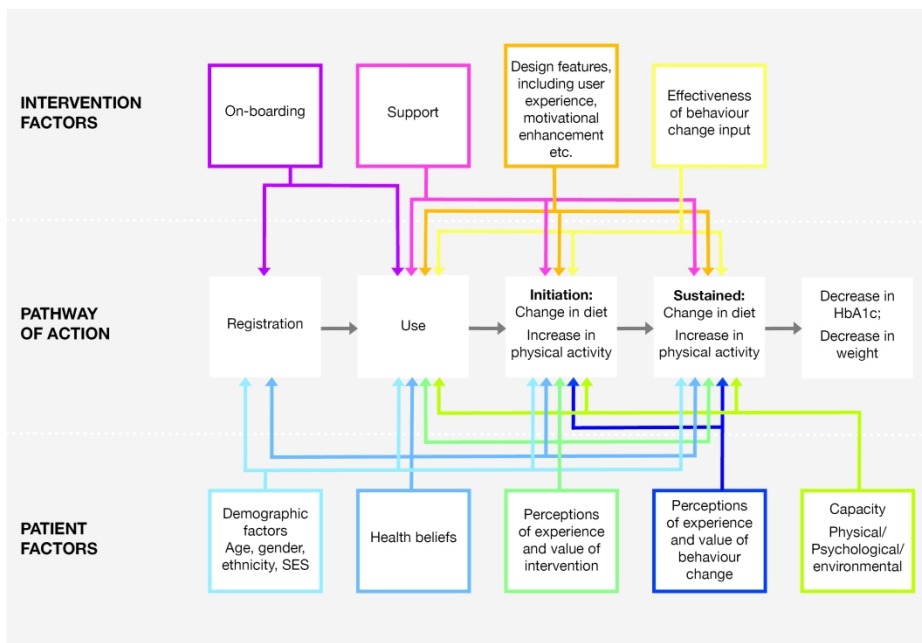

Figure 1: Theory of change / pathway of action for effects of intervention

297x209mm (300 x 300 DPI)

**Appendix 1: TIDIER check list.**

Items included in the Template for Intervention Description and Replication (TIDieR) checklist: information to include when describing an intervention. Full version of checklist provides space for authors and reviewers to give location of the information

**Item****No****Item****Brief name**

1 Provide the name or a phrase that describes the intervention

**Why**

2 Describe any rationale, theory, or goal of the elements essential to the intervention

**What**

3 **Materials:** Describe any physical or informational materials used in the intervention, including those provided to participants or used in intervention delivery or in training of intervention providers. Provide information on where the materials can be accessed (such as online appendix, URL)

4 **Procedures:** Describe each of the procedures, activities, and/or processes used in the intervention, including any enabling or support activities

**Who provided**

5 For each category of intervention provider (such as psychologist, nursing assistant), describe their expertise, background, and any specific training given

**How**

6 Describe the modes of delivery (such as face to face or by some other mechanism, such as internet or telephone) of the intervention and whether it was provided individually or in a group

**Where**

7 Describe the type(s) of location(s) where the intervention occurred, including any necessary infrastructure or relevant features

**When and How Much**

8 Describe the number of times the intervention was delivered and over what period of time including the number of sessions, their schedule, and their duration, intensity, or dose

**Tailoring**

9 If the intervention was planned to be personalised, titrated or adapted, then describe what, why, when, and how

**Modifications**

10\* If the intervention was modified during the course of the study, describe the changes (what, why, when, and how)

**How well**

11 **Planned:** If intervention adherence or fidelity was assessed, describe how and by whom, and if any strategies were used to maintain or improve fidelity, describe them

12\* **Actual:** If intervention adherence or fidelity was assessed, describe the extent to which the intervention was delivered as planned

\*If checklist is completed for a protocol, these items are not relevant to protocol and cannot be described until study is complete.



**Appendix 2: Key constructs of CFIR**

| <b>I. INTERVENTION CHARACTERISTICS</b> |                              |                                                                                                                                                                                                    |
|----------------------------------------|------------------------------|----------------------------------------------------------------------------------------------------------------------------------------------------------------------------------------------------|
| A                                      | Intervention Source          | Perception of key stakeholders about whether the intervention is externally or internally developed.                                                                                               |
| B                                      | Evidence Strength & Quality  | Stakeholders' perceptions of the quality and validity of evidence supporting the belief that the intervention will have desired outcomes.                                                          |
| C                                      | Relative Advantage           | Stakeholders' perception of the advantage of implementing the intervention versus an alternative solution.                                                                                         |
| D                                      | Adaptability                 | The degree to which an intervention can be adapted, tailored, refined, or reinvented to meet local needs.                                                                                          |
| E                                      | Trialability                 | The ability to test the intervention on a small scale in the organization, and to be able to reverse course (undo implementation) if warranted.                                                    |
| F                                      | Complexity                   | Perceived difficulty of implementation, reflected by duration, scope, radicalness, disruptiveness, centrality, and intricacy and number of steps required to implement.                            |
| G                                      | Design Quality & Packaging   | Perceived excellence in how the intervention is bundled, presented, and assembled.                                                                                                                 |
| H                                      | Cost                         | Costs of the intervention and costs associated with implementing the intervention including investment, supply, and opportunity costs.                                                             |
| <b>II. OUTER SETTING</b>               |                              |                                                                                                                                                                                                    |
| A                                      | Patient Needs & Resources    | The extent to which patient needs, as well as barriers and facilitators to meet those needs, are accurately known and prioritized by the organization.                                             |
| B                                      | Cosmopolitanism              | The degree to which an organization is networked with other external organizations.                                                                                                                |
| C                                      | Peer Pressure                | Mimetic or competitive pressure to implement an intervention; typically because most or other key peer or competing organizations have already implemented or are in a bid for a competitive edge. |
| D                                      | External Policy & Incentives | A broad construct that includes external strategies to spread interventions, including policy and regulations (governmental                                                                        |

|                           |                                     |                                                                                                                                                                                                                                                                                                                                                                      |
|---------------------------|-------------------------------------|----------------------------------------------------------------------------------------------------------------------------------------------------------------------------------------------------------------------------------------------------------------------------------------------------------------------------------------------------------------------|
|                           |                                     | or other central entity), external mandates, recommendations and guidelines, pay-for-performance, collaboratives, and public or benchmark reporting.                                                                                                                                                                                                                 |
| <b>III. INNER SETTING</b> |                                     |                                                                                                                                                                                                                                                                                                                                                                      |
| A                         | Structural Characteristics          | The social architecture, age, maturity, and size of an organization.                                                                                                                                                                                                                                                                                                 |
| B                         | Networks & Communications           | The nature and quality of webs of social networks and the nature and quality of formal and informal communications within an organization.                                                                                                                                                                                                                           |
| C                         | Culture                             | Norms, values, and basic assumptions of a given organization.                                                                                                                                                                                                                                                                                                        |
| D                         | Implementation Climate              | The absorptive capacity for change, shared receptivity of involved individuals to an intervention, and the extent to which use of that intervention will be rewarded, supported, and expected within their organization.                                                                                                                                             |
| 1                         | Tension for Change                  | The degree to which stakeholders perceive the current situation as intolerable or needing change.                                                                                                                                                                                                                                                                    |
| 2                         | Compatibility                       | The degree of tangible fit between meaning and values attached to the intervention by involved individuals, how those align with individuals' own norms, values, and perceived risks and needs, and how the intervention fits with existing workflows and systems.                                                                                                   |
| 3                         | Relative Priority                   | Individuals' shared perception of the importance of the implementation within the organization.                                                                                                                                                                                                                                                                      |
| 4                         | Organizational Incentives & Rewards | Extrinsic incentives such as goal-sharing awards, performance reviews, promotions, and raises in salary, and less tangible incentives such as increased stature or respect.                                                                                                                                                                                          |
| 5                         | Goals and Feedback                  | The degree to which goals are clearly communicated, acted upon, and fed back to staff, and alignment of that feedback with goals.                                                                                                                                                                                                                                    |
| 6                         | Learning Climate                    | A climate in which: a) leaders express their own fallibility and need for team members' assistance and input; b) team members feel that they are essential, valued, and knowledgeable partners in the change process; c) individuals feel psychologically safe to try new methods; and d) there is sufficient time and space for reflective thinking and evaluation. |



|    |                                           |                                             |                                                                                                                                                                                                                       |
|----|-------------------------------------------|---------------------------------------------|-----------------------------------------------------------------------------------------------------------------------------------------------------------------------------------------------------------------------|
| 1  | E                                         | Readiness for Implementation                | Tangible and immediate indicators of organizational commitment to its decision to implement an intervention.                                                                                                          |
| 2  | 1                                         | Leadership Engagement                       | Commitment, involvement, and accountability of leaders and managers with the implementation.                                                                                                                          |
| 3  | 2                                         | Available Resources                         | The level of resources dedicated for implementation and on-going operations, including money, training, education, physical space, and time.                                                                          |
| 4  | 3                                         | Access to Knowledge & Information           | Ease of access to digestible information and knowledge about the intervention and how to incorporate it into work tasks.                                                                                              |
| 5  | <b>IV. CHARACTERISTICS OF INDIVIDUALS</b> |                                             |                                                                                                                                                                                                                       |
| 6  | A                                         | Knowledge & Beliefs about the Intervention  | Individuals' attitudes toward and value placed on the intervention as well as familiarity with facts, truths, and principles related to the intervention.                                                             |
| 7  | B                                         | Self-efficacy                               | Individual belief in their own capabilities to execute courses of action to achieve implementation goals.                                                                                                             |
| 8  | C                                         | Individual Stage of Change                  | Characterization of the phase an individual is in, as he or she progresses toward skilled, enthusiastic, and sustained use of the intervention.                                                                       |
| 9  | D                                         | Individual Identification with Organization | A broad construct related to how individuals perceive the organization, and their relationship and degree of commitment with that organization.                                                                       |
| 10 | E                                         | Other Personal Attributes                   | A broad construct to include other personal traits such as tolerance of ambiguity, intellectual ability, motivation, values, competence, capacity, and learning style.                                                |
| 11 | <b>V. PROCESS</b>                         |                                             |                                                                                                                                                                                                                       |
| 12 | A                                         | Planning                                    | The degree to which a scheme or method of behavior and tasks for implementing an intervention are developed in advance, and the quality of those schemes or methods.                                                  |
| 13 | B                                         | Engaging                                    | Attracting and involving appropriate individuals in the implementation and use of the intervention through a combined strategy of social marketing, education, role modeling, training, and other similar activities. |
| 14 | 1                                         | Opinion Leaders                             | Individuals in an organization who have formal or informal influence on the attitudes and beliefs of their colleagues with respect to implementing the intervention.                                                  |

|   |                                                    |                                                                                                                                                                                                                       |
|---|----------------------------------------------------|-----------------------------------------------------------------------------------------------------------------------------------------------------------------------------------------------------------------------|
| 2 | Formally Appointed Internal Implementation Leaders | Individuals from within the organization who have been formally appointed with responsibility for implementing an intervention as coordinator, project manager, team leader, or other similar role.                   |
| 3 | Champions                                          | "Individuals who dedicate themselves to supporting, marketing, and 'driving through' an [implementation]" [101] (p. 182), overcoming indifference or resistance that the intervention may provoke in an organization. |
| 4 | External Change Agents                             | Individuals who are affiliated with an outside entity who formally influence or facilitate intervention decisions in a desirable direction.                                                                           |
| C | Executing                                          | Carrying out or accomplishing the implementation according to plan.                                                                                                                                                   |
| D | Reflecting & Evaluating                            | Quantitative and qualitative feedback about the progress and quality of implementation accompanied with regular personal and team debriefing about progress and experience.                                           |

# BMJ Open

## Evaluation of the Digital Diabetes Prevention Programme Pilot: Uncontrolled Mixed Methods Study Protocol.

|                                 |                                                                                                                                                                                                                                                                                                                                                                                                                                                                                                                                              |
|---------------------------------|----------------------------------------------------------------------------------------------------------------------------------------------------------------------------------------------------------------------------------------------------------------------------------------------------------------------------------------------------------------------------------------------------------------------------------------------------------------------------------------------------------------------------------------------|
| Journal:                        | <i>BMJ Open</i>                                                                                                                                                                                                                                                                                                                                                                                                                                                                                                                              |
| Manuscript ID                   | bmjopen-2018-025903.R2                                                                                                                                                                                                                                                                                                                                                                                                                                                                                                                       |
| Article Type:                   | Protocol                                                                                                                                                                                                                                                                                                                                                                                                                                                                                                                                     |
| Date Submitted by the Author:   | 02-Apr-2019                                                                                                                                                                                                                                                                                                                                                                                                                                                                                                                                  |
| Complete List of Authors:       | Murray, Elizabeth; University College London, Research Department of Primary Care and Population Health<br>Daff, Kerry; RSM UK Consulting LLP<br>Lavida, Anthi; University College London, Primary Care and Population Health<br>Henley, W; Institute of Health Research, University of Exeter Medical School, College House, St Luke's Campus, Exeter, Devon, UK, EX1 2LU<br>Irwin, Jenny; RSM UK Consulting LLP<br>Valabhji, Jonathan; NHS England, Medical Directorate; Imperial College Healthcare NHS Trust, Diabetes and Endocrinology |
| <b>Primary Subject Heading</b>: | Public health                                                                                                                                                                                                                                                                                                                                                                                                                                                                                                                                |
| Secondary Subject Heading:      | Diabetes and endocrinology, General practice / Family practice, Health policy, Health services research                                                                                                                                                                                                                                                                                                                                                                                                                                      |
| Keywords:                       | DIABETES & ENDOCRINOLOGY, Health policy < HEALTH SERVICES ADMINISTRATION & MANAGEMENT, digital health, PREVENTIVE MEDICINE                                                                                                                                                                                                                                                                                                                                                                                                                   |
|                                 |                                                                                                                                                                                                                                                                                                                                                                                                                                                                                                                                              |

SCHOLARONE™  
Manuscripts

## Title Page

**Title: Evaluation of the Digital Diabetes Prevention Programme Pilot: Uncontrolled Mixed Methods Study Protocol.**

## Authors

Elizabeth Murray<sup>1</sup>  
Kerry Daff<sup>2</sup>  
Anthi Lavidia<sup>1</sup>  
William Henley<sup>3</sup>  
Jenny Irwin<sup>2</sup>  
Jonathan Valabhji<sup>4,5</sup>

### Affiliations:

<sup>1</sup>Research Department of Primary Care and Population Health, University College London, Upper Floor 3, Royal Free Hospital, Rowland Hill Street, London NW3 2PF.

<sup>2</sup>RSM UK Consulting LLP  
Number One Lanyon Quay, Belfast, BT1 3LG

<sup>3</sup>Health Statistics Group, Institute of Health Research, University of Exeter Medical School, Exeter EX1 2LU.

<sup>4</sup>Medical Directorate, NHS England, Skipton House, 80 London Road, London SE1 6LH

<sup>5</sup>Imperial College Healthcare NHS Trust and Imperial College London, Department of Diabetes and Endocrinology, 1<sup>st</sup> Floor Mint Wing, St Mary's Hospital, London W2 1NY.

### Email addresses:

[Elizabeth.murray@ucl.ac.uk](mailto:Elizabeth.murray@ucl.ac.uk)

[Kerry.Daff@rsmuk.com](mailto:Kerry.Daff@rsmuk.com)

[A.lavidia@ucl.ac.uk](mailto:A.lavidia@ucl.ac.uk)

[W.e.henley@exeter.ac.uk](mailto:W.e.henley@exeter.ac.uk)

[Jenny.irwin@rsmuk.com](mailto:Jenny.irwin@rsmuk.com)

[Jonathan.Valabhji@nhs.net](mailto:Jonathan.Valabhji@nhs.net)

**Corresponding author: Elizabeth Murray**

Word count: 4,286

## Abstract

### Introduction

The prevalence of type 2 diabetes is rising steeply. National Health Service England (NHSE) are exploring the potential of a digital diabetes prevention programme (DDPP) and have commissioned a pilot with embedded evaluation.

### Methods and analysis

This study aims to determine whether, and if so, how, should NHSE implement a national digital diabetes prevention programme, using a mixed methods pretest – posttest design, underpinned by two theoretical frameworks: the CALO-RE taxonomy of behaviour change techniques for the digital interventions and the Consolidated Framework of Implementation Research for implementation processes. In eight pilot areas across England, adults with non-diabetic hyperglycaemia (NDH) (HbA1c 42 – 47 mmol/mol, or fasting plasma glucose 5.5-6.9 mmol/l) and adults without NDH who are overweight (BMI >25) or obese (BMI >30) will be referred to one of 5 digitally delivered diabetes prevention interventions. The primary outcomes are reduction in HbA1c and weight (for people with NDH) and reduction in weight (for people who are overweight or obese) at 12 months. Secondary outcomes include use of the intervention, satisfaction, physical activity, patient activation and resources needed for successful implementation. Quantitative data will be collected at baseline, 6 months and 12 months by the digital intervention providers. Qualitative data will be collected through semi-structured interviews with commissioners, providers, health care professionals and patients. Quantitative data will be analysed descriptively and using generalised linear models to determine whether changes in outcomes are associated with demographic and intervention factors. Qualitative data will be analysed using framework analysis, with data pertaining to implementation mapped onto the CFIR.

### Ethics and Dissemination

The study has received ethical approval from the Public Health England Ethics and Research Governance Group (reference R&D 324). Dissemination will include a report to NHSE to inform future policy, and publication in peer reviewed journals.

**Key words:** Diabetes Mellitus, type 2; Health promotion; Primary Prevention; eHealth; internet; Digital Divide; Health Policy.

### Strengths and limitations of this study

- This will be the first large-scale evaluation of digital diabetes prevention programmes internationally, and will provide data on effectiveness, uptake rates, and on resources required for effective implementation, allowing a realistic determination of potential population impact.
- It benefits from real-world experience and data, providing strong external validity.
- The lack of a comparator or any randomisation means that any changes in outcomes observed during the study cannot be said to be due to the interventions offered. Changes observed may be due to the impact of identification and measurement, the interventions offered, regression to the mean, or some other unmeasured confounder.

## Introduction

Diabetes is a national and international priority for health services, with a steeply rising prevalence. Globally, it affects over 400 million people, or around 9% of the adult population (1), and of these, over 90% have type 2 diabetes (T2DM). There were an estimated 3.7 million people with diabetes in England in 2016 – 17 (2). People with diabetes are at risk of complications including cardiovascular disease, nephropathy, retinopathy and neuropathy. The costs of treating diabetes and its complications are estimated at 10% of the total NHS budget, or some £10 billion per annum (3, 4).

Risk factors for developing T2DM include diet, lack of physical activity, obesity, genetic factors and deprivation. For many people, T2DM is a preventable illness, with prevention focused on the modifiable factors of diet, physical activity and weight. There is high quality international evidence that face-to-face programmes focusing on these three factors can reduce the rate of progression to T2DM in high risk individuals (5-16). To be successful, these programmes appear to require intensive sustained input over a prolonged period of time (7). In light of this evidence National Health Service England (NHSE) launched *Healthier You: The NHS Diabetes Prevention Programme* (NHS DPP) in 2015, initially in seven demonstrator sites, and subsequently rolled out across England. All programmes within the NHS DPP must offer at least 16 hours of face-to-face contact, spread over 13 sessions, with the total programme lasting at least 9 months (17).

NHSE is also considering a national digital diabetes prevention programme (DDPP), and in order to generate the evidence to inform future policy in this area, launched a pilot DDPP in 2017, called "*Healthier You: NHS Diabetes Prevention Programme digital stream*" (18). The reasons cited by NHSE for exploring the potential of a digital DPP are two-fold: firstly, digital delivery may overcome some of the challenges affecting face-to-face programmes; and secondly, systematic review evidence that digital health interventions can be effective in increasing physical activity, changing diets and promoting weight loss (19-28), all behaviours which are effective in preventing type 2 diabetes. Challenges affecting the population impact of face-to-face programmes include problems of acceptability, as their intensive nature may make it difficult for people who work or have other commitments in their lives to attend; and there may be perceived stigma in attending a programme aimed at prevention of type 2 diabetes. Finally, the face to face programmes are costly, particularly when implemented at scale and a digital programme could potentially be easier to deliver at scale and more cost-effective.

However, there is little evidence to support these potential advantages (29), and there are some well documented challenges in the delivery of digital health interventions. Three of the most important of these challenges are problems with engagement and adherence; concerns around the "digital divide"; and well documented problems with implementation. Many digital health interventions show low rates of initial uptake as well as high rates of subsequent attrition from the intervention, which limits their potential for population impact (30). Moreover, there is uncertainty as to how best to improve engagement and adherence – although there are data which suggest that a certain amount of human input, for example in the form of supportive or coaching telephone calls, can improve engagement, the requirement for human input can impact on the scalability and costs of digital health interventions (31-33). There is real concern that the "digital divide" (the divide between those who do and do not make regular use of digital technology) will exacerbate health inequalities, as many of those with greatest health needs (older people, people with long term health problems, and those with low incomes) are also people who make less use of digital technology (34-38). Thirdly, the challenges of successful implementation of digital health interventions are well known (39, 40), with few examples of successful integration of digital health interventions into routine health care and considerable uncertainty as to how best to achieve such integration.

1  
2  
3  
4  
5  
6  
7  
8  
9  
10  
11  
12  
13  
14  
15  
16  
17  
18  
19  
20  
21  
22  
23  
24  
25  
26  
27  
28  
29  
30  
31  
32  
33  
34  
35  
36  
37  
38  
39  
40  
41  
42  
43  
44  
45  
46  
47  
48  
49  
50  
51  
52  
53  
54  
55  
56  
57  
58  
59  
60

In the light of this potential, coupled with these major areas of uncertainty, NHSE commissioned a pilot DDPP with associated evaluation to run alongside the national DPP. In the initial tender document, NHSE specified that the goal of the pilot and associated evaluation was to inform future policy in this area, and as such, the overarching aim of the evaluation was to determine: **“Whether, and if so, how, should NHSE roll out a national digital diabetes prevention programme at the end of the pilot?”** Specific areas of interest were around uptake, use, and impact on weight and glycated haemoglobin; the likely impact of a digital programme on health inequalities; and how the interventions should be integrated into NHS workflows, including determining the resource requirements for successful implementation. Although a formal comparison of the effectiveness of different interventions was out of scope, NHSE were interested in whether specific features of different interventions appeared to be associated with variation in observed uptake, use or impact. The tender specified that a formal health economic analysis was out of scope. The evaluation is due to report in 2020.

The specific objectives of the evaluation can be grouped into three areas: uptake, use and impact of the interventions; the extent to which uptake, use and impact vary by socio-economic status as an indicator of likely impact on health inequalities; and factors relating to implementation.

Objectives pertaining to uptake, use and impact:

1. Determine uptake and use of the digital diabetes prevention interventions by people referred to them through the DDPP;
2. Determine the effects of digital diabetes prevention interventions on people referred to them through the DDPP;
3. Explore the extent to which these benefits vary according to differences in key features of the selected digital diabetes prevention interventions;
4. Explore user views about the acceptability of digital diabetes prevention interventions, including perceptions relating to use / non-use and impact on relevant behaviours;

Objectives pertaining to health inequalities:

5. Explore the extent to which uptake, use and effects vary by SES;

Objectives pertaining to implementation:

6. Describe the various implementation strategies applied in the 8 demonstrator sites;
7. Determine the costs associated with implementing and delivering a DDPP, from an NHS perspective;
8. Explore commissioner, health care professional and provider views about key factors influencing implementation, uptake, and impact of the digital diabetes prevention interventions.
9. Summarise and synthesise these data in a report which can be used to inform the policy decisions about whether, and if so, how, to roll out a digital diabetes prevention programme across England.

## Methods.

**Design:** Mixed methods pretest – posttest design, underpinned by theory.

## **Theoretical frameworks:**



1  
2  
3 This evaluation will be underpinned by two theoretical frameworks: one pertaining to the  
4 effectiveness of the digital diabetes prevention intervention (DDPI), and one pertaining to the  
5 implementation processes.  
6

7 Understanding the likely and observed effectiveness of the selected DDPI will be promoted  
8 by applying the CALO-RE taxonomy of behaviour change techniques (41) and describing  
9 interventions using the TiDIER framework (42) (Appendix 1).  
10

11 To help with describing and understanding the implementation processes we will use the  
12 Consolidated Framework for Implementation Research (CFIR) (43). This specifies that the  
13 key constructs which determine whether an intervention is successfully implemented or not  
14 are: Intervention characteristics; Outer setting; Inner setting; Individual characteristics; and  
15 the Implementation Process (for details see Appendix 2).  
16

### 17 ***Patient and Public Involvement (PPI):***

18 The Board overseeing the NSHE programme in diabetes and diabetes prevention is made  
19 up of a triumvirate of NHSE, Public Health England (PHE), and Diabetes UK (DUK). DUK is  
20 the largest charity representing the voice of people with diabetes in the UK. PPI involvement  
21 in this study was therefore provided by DUK, through their membership of the Board. This  
22 Board determined the how the digital diabetes prevention programme should be piloted and  
23 evaluated, what the requirements for the evaluation were, including overall design (numbers  
24 of demonstrator sites, digital diabetes prevention interventions, pre- post- test design,  
25 primary outcomes and duration of study). The Board also provides oversight of the conduct  
26 and progress of the study and will receive the reports of the study. Hence there was PPI  
27 input into determining the research questions, outcome measures, study design and  
28 dissemination.  
29  
30

### 31 ***Setting:***

32 Eight demonstrator sites were selected by NHSE in parallel with the selection of the  
33 evaluator team, who had no input into site selection. Sites volunteered to participate in the  
34 digital pilot, and were selected to achieve a range of geographies and demographics,  
35 including rural, semi-rural, urban and metropolitan areas, with widely varying proportions of  
36 people from Black and Minority Ethnic (BME) backgrounds, socio-economic status, and pre-  
37 existing levels of digital readiness and engagement with diabetes prevention.  
38  
39

### 40 ***Populations and participants:***

41 There were three populations specified by NHSE: (i) adults with non-diabetic  
42 hyperglycaemia (NDH), defined as having had a glycated haemoglobin (HbA1c)  
43 measurement of 42 – 47 mmol/mol, or a fasting glucose measurement of 5.5-6.9 mmol/l, in  
44 the 12 months prior to referral; (ii) adults who are overweight (Body Mass Index of 25 to <  
45 30) without NDH; and (iii) adults who are obese (BMI of 30 or over) without NDH. It is the  
46 responsibility of the 8 demonstrator sites to determine how they will identify people who fell  
47 into these three populations, how GPs and patients will be informed about the programme,  
48 and how patients will be referred to a digital diabetes prevention intervention. In most sites,  
49 patients will be referred to the interventions by their health care professionals, usually their  
50 GPs. In some areas identification and referral may be undertaken by alternative providers  
51 contracted to undertake assessment of cardiovascular risk as part of the NHS Health Check  
52 Programme, which includes a two stage assessment that aims to identify NDH and  
53 undiagnosed Type 2 diabetes (44). Referring health care professionals are responsible for  
54 discussing the referral with patients, to ensure patients understand their diagnosis, the type  
55 of intervention they are being referred to and the expected benefits. Referring health care  
56 professionals are responsible for sending the patient's name and contact details to the  
57 relevant digital diabetes prevention intervention provider; that provider is then responsible for  
58 contacting the patient and onboarding them to the intervention. These processes are  
59 identical to those used in the national face-to-face diabetes prevention programme (45), with  
60

1  
2  
3 the only difference being that the provider is offering a digital, rather than a face-to-face,  
4 intervention.  
5

### 6 **Interventions:**

7 A total of five digital diabetes prevention interventions (DDPI) were selected following a  
8 multi-stage selection process undertaken by an independent assessor (Our Mobile Health)  
9 under contract to NHSE. Following widespread advertising of the opportunity, 84 companies  
10 registered an interest and underwent initial screening against six criteria. These were: (i)  
11 that the intervention supported behaviour change; (ii) was available by June 2017; (iii) was  
12 localised for the English market; (iv) was underpinned by an evidence-based approach; (v)  
13 did not require any further integration with existing health IT systems before launching; (vi)  
14 had a pricing system in place (although cost itself was not a criterion). 30 providers met  
15 these criteria and progressed to a self-assessment exercise which explored 8 criteria: safety;  
16 privacy and security; pricing; evidence-base or indicators of effectiveness; usability and  
17 accessibility; technical stability; change management; and interoperability. The self-  
18 assessment questionnaire can be found at <https://developer.nhs.uk/daq> (46). This led to a  
19 shortlist of 14 interventions, which were reviewed by subject matter experts including  
20 behaviour change theory experts, clinical safety officers, GPs, diabetologists, diabetes  
21 specialist nurses and dieticians. The final sample were selected to vary on factors known to  
22 be important in influencing uptake, use and effectiveness of digital health interventions,  
23 namely: the delivery platform (smart phone vs. not); the amount of human interaction to  
24 promote uptake; and inclusion (or not) of wearables. Within this, interventions with better  
25 pre-existing evidence for uptake, use and effectiveness as well as capabilities and  
26 infrastructure to implement at scale, were prioritised.  
27  
28

29 All five interventions focused on dietary intake, weight loss and physical activity, and all  
30 interventions set personalised goals and provided feedback on progress toward these goals.  
31

32 Intervention A (Buddi Nujjer) is a smartphone app, which links to a wristband for monitoring  
33 physical activity. The participants log their eating habits and activities via the programme,  
34 receive three motivational messages from the app per day, and complete a total of 22  
35 learning modules over the course of the 12-month programme. Onboarding is done by an  
36 initial phone call and email for registration. A customer services team is available for those  
37 who have technical difficulties, but apart from that, the service is entirely digital.  
38  
39

40 Intervention B (Hitachi) is smartphone (Android and Apple), tablet and desktop compatible.  
41 The solution provides a hybrid of digital and non-digital interactions with a website and a  
42 series of phone calls with an experienced health advisor, whose advice follows NHS  
43 guidelines. Participants and health advisors set an action plan at the start of the programme.  
44 Participants then self-report their outcomes and log their lifestyle on the website to  
45 understand their progress against key milestones and objectives. This information goes back  
46 to the health advisor team who prompt on guidance and can interact with participants. Health  
47 advisors contact participants monthly for the first six months and have one more step-down  
48 call at the 8-month mark. Pedometers and scales can be provided on request. Onboarding  
49 is done through an initial brief phone call, at which point a longer, goal setting telephone call  
50 is arranged.  
51

52 Intervention C (Liva) is smartphone (Android and Apple), tablet and desktop compatible.  
53 There is an initial face to face appointment with a health coach for onboarding and goal  
54 setting, followed by 26 coaching sessions with the same coach, delivered weekly for the first  
55 12 weeks and then tapering off in frequency. There is an online peer support group.  
56  
57

58 Intervention D (Ourpath) is smartphone (Android and Apple), tablet and desktop compatible  
59 and includes wireless weighing scales and a wearable activity tracker. Participants are  
60 entered into a peer group of up to 10 other people with similar goals who live locally. Groups

1  
2  
3 interact by group messaging, and group targets are set as well as individual ones. The  
4 programme has three stages: the 'Core' programme with daily education content received  
5 through the app for the first 6 weeks, the 'Sustain' programme with weekly education content  
6 until the 6-month mark, and the final 6 months where the user will have completed all the  
7 education modules but still have access to the dietician and group support. Onboarding is  
8 done through two phone calls – an initial introductory one, and a second one to set the  
9 participant up with the programme and group.  
10

11 Intervention E (Oviva) is an app (Android and Apple compatible) with supporting material  
12 (learning materials, podcasts, recipes) delivered through an online portal. For patients  
13 without a smartphone, the content can be delivered via phone calls. The app allows users to  
14 track their activity, weight, and food and drink intake (using a photo food diary). The  
15 programme is a mix of digital and non-digital interactions with a series of phone calls  
16 accompanying the app. The programme is more intense at the start with a weekly phone call  
17 in the first 8 weeks to cover the 16-topic curriculum, tapering to a monthly phone call  
18 thereafter. The phone calls are all conducted by the same dietician who is a specialist  
19 diabetes dietician with at least two years experience. Onboarding is done by the dietician in  
20 the first phone call.  
21  
22

23 The interventions will be described according to the TiDIER Framework for describing  
24 complex interventions (42) and the CALO-RE Behaviour Change Technique taxonomy (41).  
25  
26

### 27 **Outcomes:**

28 The primary outcomes were pre-specified by NHS England, and were change between  
29 baseline and 12 months in HbA1c for the population with NDH and weight for all three  
30 populations. Changes over 6 months are considered secondary outcomes.  
31  
32

33 Secondary and explanatory outcomes have been selected according to our pathway of  
34 action model, which posits that the digital diabetes prevention intervention achieves its goal  
35 of reducing a user's risk of diabetes by promoting behaviour change, specifically, promoting  
36 dietary change and an increase in physical activity. Taken together these behaviour  
37 changes result in reduced HbA1c and reduced weight. To achieve these changes requires  
38 the user to: register with the intervention; use the intervention; initiate behaviour change; and  
39 sustain behaviour change. Effects at each stage will be moderated by intervention factors  
40 and by patient factors (see Figure 1). The context and implementation process will also  
41 affect the overall population uptake and impact.  
42

43 Secondary outcomes are listed in Table 1 and include intervention uptake, use and  
44 satisfaction; behavioural and clinical outcomes; and costs related to implementation,  
45 although it should be noted that a formal health economic analysis was excluded from the  
46 brief. Data will be collected at baseline, 6 months and 12 months.  
47  
48

49 Measures used are the Friends and Family Test (FFT) (47) to measure satisfaction with  
50 care, the International Physical Activity Questionnaire (48) to measure physical activity, and  
51 the 13 item Patient Activation Measure (PAM-13)(49).  
52

53 Demographic characteristics are collected at baseline only and will be used as explanatory  
54 factors. Demographic data to be collected includes age (date of birth), gender, ethnicity,  
55 postcode (to be used for determining socio-economic status by mapping against the Index of  
56 Multiple Deprivation (IMD)) and highest level of education attained.  
57  
58  
59  
60

**Table 1: Quantitative Outcomes**

|                                                                                | Population      |                    | Time point for collection |    |     |
|--------------------------------------------------------------------------------|-----------------|--------------------|---------------------------|----|-----|
|                                                                                | NDH             | Overweight / Obese | Baseline                  | 6m | 12m |
| <b>Primary Outcome</b>                                                         | HbA1c<br>Weight | Weight             | X                         | X  | X   |
| <b>Secondary outcomes</b>                                                      |                 |                    |                           |    |     |
| <b>Intervention Factors</b>                                                    |                 |                    |                           |    |     |
| Amount of human support planned and delivered (coaching, phone calls, emails). | X               | X                  |                           | X  | X   |
| Numbers referred                                                               | X               | X                  | X                         | X  | X   |
| Numbers registered                                                             | X               | X                  | X                         | X  | X   |
| Numbers who start to use the intervention                                      | X               | X                  | X                         | X  | X   |
| Numbers who complete the intervention                                          | X               | X                  | X                         | X  | X   |
| Usage data for each user                                                       | X               | X                  | X                         | X  | X   |
| Friends and Families Test                                                      | X               | X                  |                           | X  | X   |
| <b>Behavioural and Clinical Outcomes</b>                                       |                 |                    |                           |    |     |
| Height for calculation of BMI                                                  | X               | X                  | X                         |    |     |
| Physical activity (IPAQ)                                                       | X               | X                  | X                         | X  | X   |
| Patient activation (PAM-13).                                                   | X               | X                  | X                         | X  | X   |
| <b>Economic outcomes</b>                                                       |                 |                    |                           |    |     |
| Cost of the digital diabetes prevention intervention                           | X               | X                  | X                         |    |     |
| Types of staff involved in implementation in each LHE                          | X               | X                  | X                         | X  | X   |
| Time spent by each member of staff on implementation of the DDPP (estimated)   | X               | X                  | X                         | X  | X   |
| Additional costs                                                               | X               | X                  | X                         | X  | X   |

**Qualitative and explanatory outcomes**

Reasons for observed differences in quantitative outcomes will be explored through qualitative interviews. These will be undertaken with a range of stakeholders, including commissioners / leads for the DDPP in selected Local Health Economies (LHE); health care professionals (GPs, practice nurses, diabetes nurses, health care assistants, practice

managers); Digital Diabetes Intervention providers; the implementation teams charged with implementing the DDPP in the selected LHE; and patients.

Interviewees will be selected through purposive sampling, aiming for variation across geographical area, digital diabetes intervention provider, disciplinary backgrounds, and areas of high and low uptake. Recruitment of interviewees will continue until a) all digital diabetes intervention providers and representatives from each demonstrator site have been interviewed, and b) data saturation is achieved.

Interviews will be conducted using semi-structured topic guides, by trained interviewers, working for RSM. The topic guides will vary according to the background of the stakeholder, with the main areas covered summarised in Table 2. Interviews will be undertaken in waves, with Wave 1 taking place during initial implementation and set up, Wave 2 once the programme is well established and Wave 3 toward the end of the pilot.

**Table 2: Qualitative and explanatory outcomes**

| Stakeholder group                                                               | Main areas of topic guide                                                                                                                                                                                              | Time point for collection |        |        |
|---------------------------------------------------------------------------------|------------------------------------------------------------------------------------------------------------------------------------------------------------------------------------------------------------------------|---------------------------|--------|--------|
|                                                                                 |                                                                                                                                                                                                                        | Wave 1                    | Wave 2 | Wave 3 |
| Local Health Economies (Commissioners, diabetes leads, health service managers) | About the LHE: <ul style="list-style-type: none"> <li>Geography, demography and priorities</li> <li>Culture and organisational style</li> <li>Rationale for engaging with DDPP (hopes, expectations, fears)</li> </ul> | X                         |        |        |
|                                                                                 | About the DDPI selected <ul style="list-style-type: none"> <li>How and why this DDPI was selected</li> <li>Views of the selected intervention</li> </ul>                                                               | X                         | X      | X      |
|                                                                                 | About the implementation plan <ul style="list-style-type: none"> <li>Describe the implementation plan</li> <li>Reflections on progress, strengths, weaknesses, amendments proposed or made</li> </ul>                  | X                         | X      | X      |
|                                                                                 | Resources required <ul style="list-style-type: none"> <li>Types and numbers of staff involved</li> <li>Time per staff member (estimated)</li> <li>Other costs / resources</li> </ul>                                   | X                         | X      | X      |
|                                                                                 | Overall lessons learnt                                                                                                                                                                                                 |                           |        | X      |
| Health care professionals                                                       | <ul style="list-style-type: none"> <li>Local geography, demography and clinical priorities</li> </ul>                                                                                                                  | X                         |        |        |
|                                                                                 | <ul style="list-style-type: none"> <li>Understanding and prioritisation of DDPP</li> </ul>                                                                                                                             | X                         | X      | X      |
|                                                                                 | <ul style="list-style-type: none"> <li>Views about DDPI in use in local area</li> </ul>                                                                                                                                | X                         | X      | X      |

|                                                   |                                                                                                                                                                                                                                                                                                                                                                                                                                                                                                                                            |   |   |   |
|---------------------------------------------------|--------------------------------------------------------------------------------------------------------------------------------------------------------------------------------------------------------------------------------------------------------------------------------------------------------------------------------------------------------------------------------------------------------------------------------------------------------------------------------------------------------------------------------------------|---|---|---|
|                                                   | <ul style="list-style-type: none"> <li>Views about potential benefits / harms of DDPP, including impact on health inequalities</li> <li>Views about implementation process locally</li> <li>Overall lessons for future national delivery</li> </ul>                                                                                                                                                                                                                                                                                        | X | X | X |
| Digital Diabetes Programme Intervention Providers | <ul style="list-style-type: none"> <li>Describe the intervention</li> <li>Describe the evidence base for the intervention</li> <li>Onboarding process</li> <li>Views on how the implementation is going in participating LHE</li> <li>Explanations and reflections on reasons for successes / challenges in implementation</li> <li>Views on whether and how this programme could be scaled up nationally</li> <li>Observed usage and impact of intervention on patients, and reasons for these</li> <li>Overall lessons learnt</li> </ul> | X |   |   |
|                                                   |                                                                                                                                                                                                                                                                                                                                                                                                                                                                                                                                            | X |   |   |
|                                                   |                                                                                                                                                                                                                                                                                                                                                                                                                                                                                                                                            | X | X | X |
|                                                   |                                                                                                                                                                                                                                                                                                                                                                                                                                                                                                                                            | X | X | X |
|                                                   |                                                                                                                                                                                                                                                                                                                                                                                                                                                                                                                                            | X | X | X |
|                                                   |                                                                                                                                                                                                                                                                                                                                                                                                                                                                                                                                            |   | X | X |
|                                                   |                                                                                                                                                                                                                                                                                                                                                                                                                                                                                                                                            |   | X | X |
| Patients                                          | <ul style="list-style-type: none"> <li>Knowledge about diabetes and its prevention</li> <li>Relative prioritisation of diabetes prevention</li> <li>Experience of DDPP including identification, referral, onboarding to DDPI, use of DDPI</li> <li>Reasons for use / non use of DDPI</li> <li>Impact of DDPI on lifestyle and health behaviours</li> <li>Preferences for digital vs. face-face</li> <li>Suggestions for improvement</li> <li>Overall views about the programme</li> </ul>                                                 |   | X |   |
|                                                   |                                                                                                                                                                                                                                                                                                                                                                                                                                                                                                                                            |   | X |   |
|                                                   |                                                                                                                                                                                                                                                                                                                                                                                                                                                                                                                                            |   | X |   |
|                                                   |                                                                                                                                                                                                                                                                                                                                                                                                                                                                                                                                            |   | X |   |
|                                                   |                                                                                                                                                                                                                                                                                                                                                                                                                                                                                                                                            |   | X |   |
|                                                   |                                                                                                                                                                                                                                                                                                                                                                                                                                                                                                                                            |   | X |   |
|                                                   |                                                                                                                                                                                                                                                                                                                                                                                                                                                                                                                                            |   | X |   |
|                                                   |                                                                                                                                                                                                                                                                                                                                                                                                                                                                                                                                            |   | X |   |

### **Data collection**

Referral forms will include basic demographic and clinical data, including HbA1c and weight recorded in the previous three months to confirm eligibility.

### **Quantitative data**

The digital diabetes prevention intervention providers are responsible for collecting all quantitative data. Baseline data will be obtained from referral forms and supplemented with



1  
2  
3 data obtained during on boarding interviews with patients. Follow up self-report data (FFT, IPAQ and PAM-13) will be collected online. HbA1c and weights will be measured by the DDPI providers or by patients' General Practices, with the method and site of measurement recorded.

8 HbA1c measurements may be done on either venous or capillary blood samples, using either registered NHS labs or validated point-of-care testing kits. Whichever measurement process is used at baseline should be used at follow-up. Weights will be recorded using calibrated scales, with patients wearing light indoor clothing.

## 14 **Data Analysis**

### 16 *Quantitative data*

17 The baseline characteristics of the three cohorts (NDH, overweight and obese) will be summarised with respect to sociodemographic characteristics, intervention uptake, behavioural and clinical outcomes and economic outcomes. Continuous data will be summarised in terms of the mean, standard deviation, and number of observations or, where skewed, median and interquartile range. Binary/categorical data will be summarised in terms of frequency counts and percentages. Descriptive statistics will also be used to explore differences in baseline characteristics across the 8 demonstrator sites and five DDPIs.

25 The primary analysis will be based on participants with complete data. For continuous outcomes, the overall effectiveness of the programme will be assessed in pre-post analyses by comparing the mean outcomes in each cohort from baseline to 6m, and from baseline to 12m (presented with 95% confidence intervals for the estimated change in outcomes). The statistical significance of any changes will be assessed using a paired t-test. For categorical outcomes, pre-post analyses will be conducted using McNemar's test.

32 Multivariable generalised linear models will be used to determine whether changes in outcomes are associated with demographic factors, adjusting for baseline outcome scores. Where necessary, continuous outcomes will be transformed to ensure good regression model fit. Exploratory analysis of the influence of potential mediators will be conducted by adding variables relating to usage and features of the digital diabetes prevention interventions to the regression models. The potential for clustering effects by demonstrator site will be considered by inclusion of random effects for the demonstrator site in the generalised linear models. Three level models accounting for clustering by GP practice within demonstrator sites will also be explored.

43 Reasons for missing data will be documented and the baseline characteristics of those with and without missing data compared. Although the primary analysis will be based on participants with complete data, we will undertake sensitivity analyses using various imputation models. The potential for bias due to non-random attrition will be addressed by fitting a propensity score model to account for drop-out on the basis of baseline characteristics and then using inverse probability weighting (IPW) based on the propensity score to fit the treatment effectiveness model (50). No formal adjustment for multiple significance testing will be applied.

### 53 *Sample size*

54 Target referral and registration numbers were pre-set by NHSE as part of the tender at 3,500 registrations for the NDH population and 1,500 for the overweight / obese population. We estimated minimum detectable effect sizes at 90% power and a 5% significance level for the key research questions, given these fixed sample sizes. Assuming a 25% completion rate (at 12 months), it will be possible to detect standardised effect sizes of  $d=0.11$  and  $d=0.17$  when assessing overall effectiveness in the NDH and overweight/obese groups respectively, assuming clustering is ignorable. This compares favourably with a weighted mean effect size



of  $d=0.22$  (95% CI: 0.20 to 0.23) estimated in a meta-analysis by Johnson et al (51) for behaviour change interventions targeting eating and physical activity. Further power analysis allowing for clustering effects by demonstrator site (with an intraclass correlation coefficient (ICC) of 0.02 based on a median estimate of 0.0185 in a study of ICCs in adults with diabetes in primary care practices(52)) gave minimum detectable effect sizes of  $d=0.18$  and 0.22 in the NDH and overweight/obese groups respectively, assuming a 25% completion rate at 12 months. For the purpose of analysis, completion is defined as obtaining data on weight and HbA1c at 12 months.

#### *Qualitative data*

Interviews will be recorded, transcribed verbatim, and anonymised prior to analysis. Transcripts will be analysed using framework analysis (53) which is well suited to policy-relevant research, with specific questions and a priori issues. The five steps of framework analysis are (i) familiarisation; (ii) identifying a thematic framework; (iii) indexing; (iv) charting and (v) mapping and interpretation. Familiarisation will be achieved by reading and re-reading transcripts, with an a priori framework based on the Consolidated Framework for Implementation Research used to index and chart the data. Data that cannot be coded using CFIR will be noted. Mapping and interpretation will take place in multi-disciplinary data clinics where interpretations can be proposed, discussed and refined.

#### **Ethics, research governance and data security**

##### *Ethics and Research governance:*

Public Health England is the sponsor for this research. Ethical approval has been granted by the Public Health England Research Ethics and Governance Group, reference R&D 324.

##### *Data security and information governance:*

Data will be handled according to the principles of the General Data Protection Regulation (GDPR), the EU framework for data protection which became law in the UK in May 2018.

Quantitative data: the digital diabetes prevention intervention providers will be responsible for obtaining and pseudonymising the quantitative data. No personally identifiable data will be handled by RSM. Postcode mapping for IMD will be undertaken by the LHE (with support from RSM).

##### Qualitative data:

- (i) Patients. Patients will be invited to participate in the interviews via the digital diabetes prevention providers and / or the local health economies and will opt in to providing fully informed consent for interviews.
- (ii) Health Care Professionals, Commissioners and Providers. RSM have the contact details for these individuals as RSM are also responsible for the implementation of the DDPI. Written informed consent will be obtained prior to undertaking interviews.

Interview tapes will be stored securely on RSM servers. Only anonymised transcripts will be shared with the evaluation team outside RSM.

#### **Dissemination**

Contracted outputs include a 12 month report to the funder, based on 6 month follow up data, and a final report, based on 12 month follow-up data. The findings will inform the scale of future provision of digital approaches within the NHS Diabetes Prevention Programme.

Academic dissemination will also be undertaken in the form of conference presentations and publications in peer-reviewed journals. These presentations and publications will require

1  
2  
3 advance approval from NHS England. Approval will not be unreasonably withheld, but  
4 academic dissemination may have to be delayed till after major policy decisions have been  
5 taken and made public.  
6  
7

#### 8 **Authors' contributions:**

9 EM and JI developed the initial outline evaluation plan in response to the NHSE tender; this  
10 was developed, refined and operationalised by EM, KD, WH and AL. WH led on the  
11 statistical analysis plan. JV chairs the NHSE Programme Board which developed and  
12 oversaw the tender. EM wrote the first draft of the protocol paper; all authors have read and  
13 commented on drafts and have approved the final version. PPI involvement was provided by  
14 Diabetes UK membership of the Board overseeing this work.  
15  
16

17 **Funding statement:** This work was supported by NHS England, as part of the overall  
18 contract for implementation and evaluation of the Digital Diabetes Prevention Programme.  
19 EM is part-funded by the NIHR School for Primary Care Research and the NIHR  
20 Collaboration for Leadership in Applied Health Research and Care, North Thames. AL is  
21 funded by the HEE Deanery (North Thames).  
22

#### 23 **Competing interests statement**

24 JI is a partner and KD a management consultant at RSM. RSM hold the contract from  
25 NHSE to implement and evaluate the Digital Diabetes Prevention Programme. EM and WH  
26 receive consultancy fees for their work on the evaluation. EM is Managing Director of a not-  
27 for-profit Community Interest Company, HeLP-Digital, which exists to disseminate a digital  
28 diabetes self-management programme, HeLP-Diabetes, across the NHS. JV is the National  
29 Clinical Director for Diabetes and Obesity at NHS England.  
30  
31

32  
33 Figure 1 caption: **Figure 1: Theory of change / pathway of action for effects of  
34 intervention.**

35  
36 Figure 1 foot-note:

37 NB: all taking place within different contexts (local health economies) and with different  
38 implementation processes.  
39  
40  
41  
42  
43  
44  
45  
46  
47  
48  
49  
50  
51  
52  
53  
54  
55  
56  
57  
58  
59  
60

## Reference List

1. Federation ID. IDF Diabetes Atlas: 2014 update 2015 [Available from: <http://www.idf.org/diabetesatlas>].
2. UK D. Diabetes statistics: diabetes prevalence London2017 [Available from: <https://www.diabetes.org.uk/professionals/position-statements-reports/statistics/diabetes-prevalence-2017>].
3. Hex N, Bartlett C, Wright D, Taylor M, Varley D. Estimating the current and future costs of Type 1 and Type 2 diabetes in the UK, including direct health costs and indirect societal and productivity costs. *DiabetMed*. 2012;29(7):855-62.
4. Alva ML, Gray A, Mihaylova B, Leal J, Holman RR. The impact of diabetes-related complications on healthcare costs: new results from the UKPDS (UKPDS 84). *Diabetic medicine : a journal of the British Diabetic Association*. 2015;32(4):459-66.
5. Aguiar EJ, Morgan PJ, Collins CE, Plotnikoff RC, Callister R. Efficacy of interventions that include diet, aerobic and resistance training components for type 2 diabetes prevention: a systematic review with meta-analysis. *The international journal of behavioral nutrition and physical activity*. 2014;11:2.
6. Ali MK, Echouffo-Tcheugui J, Williamson DF. How effective were lifestyle interventions in real-world settings that were modeled on the Diabetes Prevention Program? *Health affairs (Project Hope)*. 2012;31(1):67-75.
7. Ashra NB, Spong R, Carter P, Davies MJ, Dunkley A, Gillies C, et al. A systematic review and meta-analysis assessing the effectiveness of pragmatic lifestyle interventions for the prevention of type 2 diabetes mellitus in routine practice. London; 2015 August 2015. Report No.: PHE publications gateway number: 2015280.
8. Aziz Z, Absetz P, Oldroyd J, Pronk NP, Oldenburg B. A systematic review of real-world diabetes prevention programs: learnings from the last 15 years. *Implementation science : IS*. 2015;10:172.
9. Baker MK, Simpson K, Lloyd B, Bauman AE, Singh MA. Behavioral strategies in diabetes prevention programs: a systematic review of randomized controlled trials. *Diabetes research and clinical practice*. 2011;91(1):1-12.
10. Dunkley AJ, Bodicoat DH, Greaves CJ, Russell C, Yates T, Davies MJ, et al. Diabetes prevention in the real world: effectiveness of pragmatic lifestyle interventions for the prevention of type 2 diabetes and of the impact of adherence to guideline recommendations: a systematic review and meta-analysis. *Diabetes Care*. 2014;37(4):922-33.
11. McCurley JL, Crawford MA, Gallo LC. Prevention of Type 2 Diabetes in U.S. Hispanic Youth: A Systematic Review of Lifestyle Interventions. *Am J Prev Med*. 2017.
12. Neamah HH, Sebert Kuhlmann AK, Tabak RG. Effectiveness of Program Modification Strategies of the Diabetes Prevention Program: A Systematic Review. *Diabetes Educ*. 2016;42(2):153-65.
13. Pronk NP, Remington PL. Combined Diet and Physical Activity Promotion Programs for Prevention of Diabetes: Community Preventive Services Task Force Recommendation Statement. *Annals of internal medicine*. 2015;163(6):465-8.
14. Public Health England. A systematic review and meta-analysis assessing the effectiveness of pragmatic lifestyle interventions for the prevention of type 2 diabetes mellitus in routine practice. London; 2015. Report No.: 2015280.
15. Subramanian K, Midha I, Chellapilla V. Overcoming the Challenges in Implementing Type 2 Diabetes Mellitus Prevention Programs Can Decrease the Burden on Healthcare Costs in the United States. *Journal of diabetes research*. 2017;2017:2615681.
16. Sun Y, You W, Almeida F, Estabrooks P, Davy B. The Effectiveness and Cost of Lifestyle Interventions Including Nutrition Education for Diabetes Prevention: A Systematic Review and Meta-Analysis. *Journal of the Academy of Nutrition and Dietetics*. 2017;117(3):404-21.e36.

17. NHS Diabetes Prevention Programme (NHS DPP): NHS England; [Available from: <https://www.england.nhs.uk/diabetes/diabetes-prevention/>].
18. NHS Diabetes Prevention Programme - Digital stream [Available from: <https://www.england.nhs.uk/diabetes/digital-innovations-to-support-diabetes-outcomes/nhs-diabetes-prevention-programme-digital-stream/>].
19. Harris J, Felix L, Miners A, Murray E, Michie S, Ferguson E, et al. Adaptive e-learning to improve dietary behaviour: a systematic review and cost-effectiveness analysis. *Health technology assessment (Winchester, England)*. 2011;15(37):1-160.
20. Norman GJ, Zabinski MF, Adams MA, Rosenberg DE, Yaroch AL, Atienza AA. A review of eHealth interventions for physical activity and dietary behavior change. *Am J Prev Med*. 2007;33(4):336-45.
21. Afshin A, Babalola D, McLean M, Yu Z, Ma W, Chen CY, et al. Information Technology and Lifestyle: A Systematic Evaluation of Internet and Mobile Interventions for Improving Diet, Physical Activity, Obesity, Tobacco, and Alcohol Use. *Journal of the American Heart Association*. 2016;5(9).
22. Seo DC, Niu J. Evaluation of Internet-Based Interventions on Waist Circumference Reduction: A Meta-Analysis. *J Med Internet Res*. 2015;17(7):e181.
23. Sherrington A, Newham JJ, Bell R, Adamson A, McColl E, Araujo-Soares V. Systematic review and meta-analysis of internet-delivered interventions providing personalized feedback for weight loss in overweight and obese adults. *Obesity reviews : an official journal of the International Association for the Study of Obesity*. 2016;17(6):541-51.
24. Schembre SM, Liao Y, Robertson MC, Dunton GF, Kerr J, Haffey ME, et al. Just-in-Time Feedback in Diet and Physical Activity Interventions: Systematic Review and Practical Design Framework. *J Med Internet Res*. 2018;20(3):e106.
25. Spruijt-Metz D, Wen CK, O'Reilly G, Li M, Lee S, Emken BA, et al. Innovations in the Use of Interactive Technology to Support Weight Management. *Current obesity reports*. 2015;4(4):510-9.
26. Bardus M, Smith JR, Samaha L, Abraham C. Mobile and Web 2.0 interventions for weight management: an overview of review evidence and its methodological quality. *European journal of public health*. 2016;26(4):602-10.
27. Muellmann S, Forberger S, Mollers T, Broring E, Zeeb H, Pischke CR. Effectiveness of eHealth interventions for the promotion of physical activity in older adults: A systematic review. *Prev Med*. 2018;108:93-110.
28. Direito A, Carraca E, Rawstorn J, Whittaker R, Maddison R. mHealth Technologies to Influence Physical Activity and Sedentary Behaviors: Behavior Change Techniques, Systematic Review and Meta-Analysis of Randomized Controlled Trials. *Ann Behav Med*. 2017;51(2):226-39.
29. Joiner KL, Nam S, Whitemore R. Lifestyle interventions based on the diabetes prevention program delivered via eHealth: A systematic review and meta-analysis. *Prev Med*. 2017;100:194-207.
30. Murray E, White IR, Varagunam M, Godfrey C, Khadjesari Z, McCambridge J. Attrition revisited: adherence and retention in a web-based alcohol trial. *J Med Internet Res*. 2013;15(8):e162.
31. Yardley L, Spring BJ, Riper H, Morrison LG, Crane DH, Curtis K, et al. Understanding and Promoting Effective Engagement With Digital Behavior Change Interventions. *Am J Prev Med*. 2016;51(5):833-42.
32. McNamee P, Murray E, Kelly MP, Bojke L, Chilcott J, Fischer A, et al. Designing and Undertaking a Health Economics Study of Digital Health Interventions. *American Journal of Preventive Medicine*. 2016.
33. O'Connor S, Hanlon P, O'Donnell CA, Garcia S, Glanville J, Mair FS. Understanding factors affecting patient and public engagement and recruitment to digital health interventions: a systematic review of qualitative studies. *BMC medical informatics and decision making*. 2016;16(1):120.
34. Dutton WH, Blank G, Groselj D. *Cultures of the Internet: The Internet in Britain*. Oxford Internet Survey 2013. Oxford: Oxford Internet Institute; 2013.

- 1
- 2
- 3
- 4 35. Gordon NP, Hornbrook MC. Older adults' readiness to engage with eHealth patient
- 5 education and self-care resources: a cross-sectional survey. *BMC health services research*.
- 6 2018;18(1):220.
- 7 36. Levy H, Janke AT, Langa KM. Health literacy and the digital divide among older
- 8 Americans. *Journal of general internal medicine*. 2015;30(3):284-9.
- 9 37. Estacio EV, Whittle R, Protheroe J. The digital divide: Examining socio-demographic
- 10 factors associated with health literacy, access and use of internet to seek health information.
- 11 *J Health Psychol*. 2017:1359105317695429.
- 12 38. Latulippe K, Hamel C, Giroux D. Social Health Inequalities and eHealth: A Literature
- 13 Review With Qualitative Synthesis of Theoretical and Empirical Studies. *J Med Internet Res*.
- 14 2017;19(4):e136.
- 15 39. Wachter RM. Making IT Work: Harnessing the Power of HealthInformation
- 16 Technology to Improve Care in England. Report of the National Advisory Group on Health
- 17 Information Technology in England. London: Department of Health and Social Care; 2016.
- 18 40. Ross J, Stevenson F, Lau R, Murray E. Factors that influence the implementation of
- 19 e-Health: A systematic review of systematic reviews (an update). *Implementation science* :
- 20 IS. 2016.
- 21 41. Michie S, Ashford S, Sniehotta FF, Dombrowski SU, Bishop A, French DP. A refined
- 22 taxonomy of behaviour change techniques to help people change their physical activity and
- 23 healthy eating behaviours: The CALO-RE taxonomy. *PsycholHealth*. 2011.
- 24 42. Hoffmann TC, Glasziou PP, Boutron I, Milne R, Perera R, Moher D, et al. Better
- 25 reporting of interventions: template for intervention description and replication (TIDieR)
- 26 checklist and guide. *BMJ*. 2014;348:g1687.
- 27 43. Damschroder LJ, Aron DC, Keith RE, Kirsh SR, Alexander JA, Lowery JC. Fostering
- 28 implementation of health services research findings into practice: a consolidated framework
- 29 for advancing implementation science. *ImplementSci*. 2009;4(1):50.
- 30 44. England PH. NHS Health Check Best Practice Guidance. London; 2016. Report No.:
- 31 2015710.
- 32 45. Barron E, Clark R, Hewings R, Smith J, Valabhji J. Progress of the Healthier You:
- 33 NHS Diabetes Prevention Programme: referrals, uptake and participant characteristics.
- 34 *Diabetic medicine : a journal of the British Diabetic Association*. 2018;35(4):513-8.
- 35 46. Digital N. Health Developer Network. Digital Assessment Questions - Beta London:
- 36 NHS Digital 2018 [Available from: <https://developer.nhs.uk/digital-tools/daq/>].
- 37 47. England N. Friends and family test. Publications Gateway Ref2014.
- 38 48. Craig CL, Marshall AL, Sjöström M, Bauman AE, Booth ML, Ainsworth BE, et al.
- 39 International physical activity questionnaire: 12-country reliability and validity. *Med Sci*
- 40 *Sports Exerc*. 2003;35.
- 41 49. Hibbard JH, Mahoney ER, Stockard J, Tusler M. Development and testing of a short
- 42 form of the patient activation measure. *Health services research*. 2005;40(6 Pt 1):1918-30.
- 43 50. Cole SR, Hernan MA. Constructing inverse probability weights for marginal structural
- 44 models. *American journal of epidemiology*. 2008;168(6):656-64.
- 45 51. Johnson BT, Scott-Sheldon LA, Carey MP. Meta-synthesis of health behavior change
- 46 meta-analyses. *Am J Public Health*. 2010;100(11):2193-8.
- 47 52. Littenberg B, MacLean CD. Intra-cluster correlation coefficients in adults with
- 48 diabetes in primary care practices: the Vermont Diabetes Information System field survey.
- 49 *BMC medical research methodology*. 2006;6:20.
- 50 53. Ritchie J, Spencer L. Qualitative data for applied policy research. In: Bryman A,
- 51 Burgess R, editors. *Analysing Qualitative Data*. London: Routledge; 1994. p. 173-94.
- 52
- 53
- 54
- 55
- 56
- 57
- 58
- 59
- 60



1  
2  
3  
4  
5  
6  
7  
8  
9  
10  
11  
12  
13  
14  
15  
16  
17  
18  
19  
20  
21  
22  
23  
24  
25  
26  
27  
28  
29  
30  
31  
32  
33  
34  
35  
36  
37  
38  
39  
40  
41  
42  
43  
44  
45  
46  
47  
48  
49  
50  
51  
52  
53  
54  
55  
56  
57  
58  
59  
60

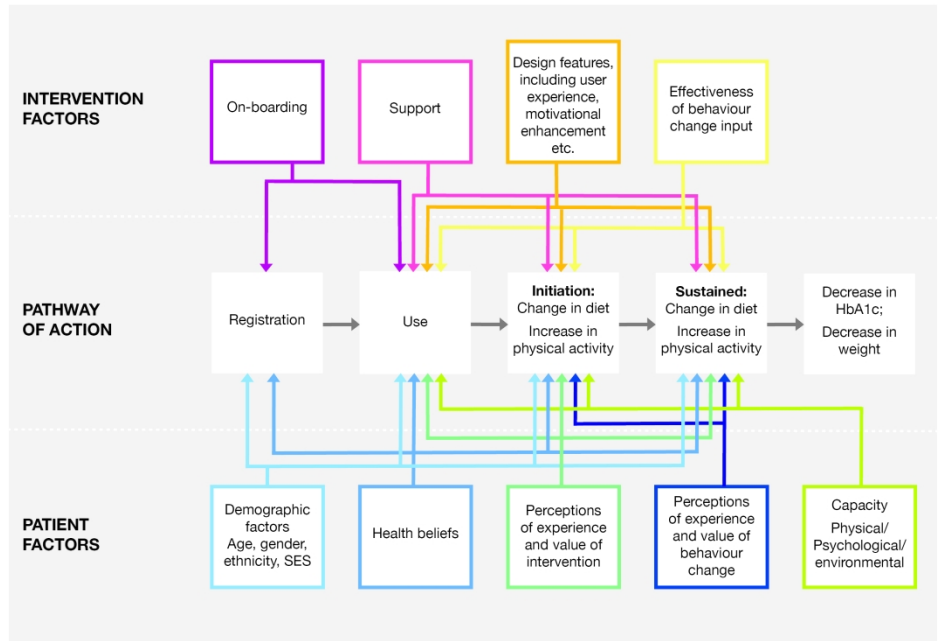

Figure 1: Theory of change / pathway of action for effects of intervention

297x209mm (300 x 300 DPI)



**Appendix 1: TIDIER check list.**

Items included in the Template for Intervention Description and Replication (TIDieR) checklist: information to include when describing an intervention. Full version of checklist provides space for authors and reviewers to give location of the information

**Item****No****Item****Brief name**

1 Provide the name or a phrase that describes the intervention

**Why**

2 Describe any rationale, theory, or goal of the elements essential to the intervention

**What**

3 **Materials:** Describe any physical or informational materials used in the intervention, including those provided to participants or used in intervention delivery or in training of intervention providers. Provide information on where the materials can be accessed (such as online appendix, URL)

4 **Procedures:** Describe each of the procedures, activities, and/or processes used in the intervention, including any enabling or support activities

**Who provided**

5 For each category of intervention provider (such as psychologist, nursing assistant), describe their expertise, background, and any specific training given

**How**

6 Describe the modes of delivery (such as face to face or by some other mechanism, such as internet or telephone) of the intervention and whether it was provided individually or in a group

**Where**

7 Describe the type(s) of location(s) where the intervention occurred, including any necessary infrastructure or relevant features

**When and How Much**

8 Describe the number of times the intervention was delivered and over what period of time including the number of sessions, their schedule, and their duration, intensity, or dose

**Tailoring**

9 If the intervention was planned to be personalised, titrated or adapted, then describe what, why, when, and how

**Modifications**

10\* If the intervention was modified during the course of the study, describe the changes (what, why, when, and how)

**How well**

11 **Planned:** If intervention adherence or fidelity was assessed, describe how and by whom, and if any strategies were used to maintain or improve fidelity, describe them

12\* **Actual:** If intervention adherence or fidelity was assessed, describe the extent to which the intervention was delivered as planned

\*If checklist is completed for a protocol, these items are not relevant to protocol and cannot be described until study is complete.

**Appendix 2: Key constructs of CFIR**

| <b>I. INTERVENTION CHARACTERISTICS</b> |                              |                                                                                                                                                                                                    |
|----------------------------------------|------------------------------|----------------------------------------------------------------------------------------------------------------------------------------------------------------------------------------------------|
| A                                      | Intervention Source          | Perception of key stakeholders about whether the intervention is externally or internally developed.                                                                                               |
| B                                      | Evidence Strength & Quality  | Stakeholders' perceptions of the quality and validity of evidence supporting the belief that the intervention will have desired outcomes.                                                          |
| C                                      | Relative Advantage           | Stakeholders' perception of the advantage of implementing the intervention versus an alternative solution.                                                                                         |
| D                                      | Adaptability                 | The degree to which an intervention can be adapted, tailored, refined, or reinvented to meet local needs.                                                                                          |
| E                                      | Trialability                 | The ability to test the intervention on a small scale in the organization, and to be able to reverse course (undo implementation) if warranted.                                                    |
| F                                      | Complexity                   | Perceived difficulty of implementation, reflected by duration, scope, radicalness, disruptiveness, centrality, and intricacy and number of steps required to implement.                            |
| G                                      | Design Quality & Packaging   | Perceived excellence in how the intervention is bundled, presented, and assembled.                                                                                                                 |
| H                                      | Cost                         | Costs of the intervention and costs associated with implementing the intervention including investment, supply, and opportunity costs.                                                             |
| <b>II. OUTER SETTING</b>               |                              |                                                                                                                                                                                                    |
| A                                      | Patient Needs & Resources    | The extent to which patient needs, as well as barriers and facilitators to meet those needs, are accurately known and prioritized by the organization.                                             |
| B                                      | Cosmopolitanism              | The degree to which an organization is networked with other external organizations.                                                                                                                |
| C                                      | Peer Pressure                | Mimetic or competitive pressure to implement an intervention; typically because most or other key peer or competing organizations have already implemented or are in a bid for a competitive edge. |
| D                                      | External Policy & Incentives | A broad construct that includes external strategies to spread interventions, including policy and regulations (governmental                                                                        |

|                           |                                     |                                                                                                                                                                                                                                                                                                                                                                      |
|---------------------------|-------------------------------------|----------------------------------------------------------------------------------------------------------------------------------------------------------------------------------------------------------------------------------------------------------------------------------------------------------------------------------------------------------------------|
|                           |                                     | or other central entity), external mandates, recommendations and guidelines, pay-for-performance, collaboratives, and public or benchmark reporting.                                                                                                                                                                                                                 |
| <b>III. INNER SETTING</b> |                                     |                                                                                                                                                                                                                                                                                                                                                                      |
| A                         | Structural Characteristics          | The social architecture, age, maturity, and size of an organization.                                                                                                                                                                                                                                                                                                 |
| B                         | Networks & Communications           | The nature and quality of webs of social networks and the nature and quality of formal and informal communications within an organization.                                                                                                                                                                                                                           |
| C                         | Culture                             | Norms, values, and basic assumptions of a given organization.                                                                                                                                                                                                                                                                                                        |
| D                         | Implementation Climate              | The absorptive capacity for change, shared receptivity of involved individuals to an intervention, and the extent to which use of that intervention will be rewarded, supported, and expected within their organization.                                                                                                                                             |
| 1                         | Tension for Change                  | The degree to which stakeholders perceive the current situation as intolerable or needing change.                                                                                                                                                                                                                                                                    |
| 2                         | Compatibility                       | The degree of tangible fit between meaning and values attached to the intervention by involved individuals, how those align with individuals' own norms, values, and perceived risks and needs, and how the intervention fits with existing workflows and systems.                                                                                                   |
| 3                         | Relative Priority                   | Individuals' shared perception of the importance of the implementation within the organization.                                                                                                                                                                                                                                                                      |
| 4                         | Organizational Incentives & Rewards | Extrinsic incentives such as goal-sharing awards, performance reviews, promotions, and raises in salary, and less tangible incentives such as increased stature or respect.                                                                                                                                                                                          |
| 5                         | Goals and Feedback                  | The degree to which goals are clearly communicated, acted upon, and fed back to staff, and alignment of that feedback with goals.                                                                                                                                                                                                                                    |
| 6                         | Learning Climate                    | A climate in which: a) leaders express their own fallibility and need for team members' assistance and input; b) team members feel that they are essential, valued, and knowledgeable partners in the change process; c) individuals feel psychologically safe to try new methods; and d) there is sufficient time and space for reflective thinking and evaluation. |

|    |                                           |                                             |                                                                                                                                                                                                                       |
|----|-------------------------------------------|---------------------------------------------|-----------------------------------------------------------------------------------------------------------------------------------------------------------------------------------------------------------------------|
| 1  | E                                         | Readiness for Implementation                | Tangible and immediate indicators of organizational commitment to its decision to implement an intervention.                                                                                                          |
| 2  |                                           |                                             |                                                                                                                                                                                                                       |
| 3  |                                           |                                             |                                                                                                                                                                                                                       |
| 4  |                                           |                                             |                                                                                                                                                                                                                       |
| 5  |                                           |                                             |                                                                                                                                                                                                                       |
| 6  | 1                                         | Leadership Engagement                       | Commitment, involvement, and accountability of leaders and managers with the implementation.                                                                                                                          |
| 7  |                                           |                                             |                                                                                                                                                                                                                       |
| 8  |                                           |                                             |                                                                                                                                                                                                                       |
| 9  |                                           |                                             |                                                                                                                                                                                                                       |
| 10 | 2                                         | Available Resources                         | The level of resources dedicated for implementation and on-going operations, including money, training, education, physical space, and time.                                                                          |
| 11 |                                           |                                             |                                                                                                                                                                                                                       |
| 12 |                                           |                                             |                                                                                                                                                                                                                       |
| 13 |                                           |                                             |                                                                                                                                                                                                                       |
| 14 |                                           |                                             |                                                                                                                                                                                                                       |
| 15 | 3                                         | Access to Knowledge & Information           | Ease of access to digestible information and knowledge about the intervention and how to incorporate it into work tasks.                                                                                              |
| 16 |                                           |                                             |                                                                                                                                                                                                                       |
| 17 |                                           |                                             |                                                                                                                                                                                                                       |
| 18 | <b>IV. CHARACTERISTICS OF INDIVIDUALS</b> |                                             |                                                                                                                                                                                                                       |
| 19 |                                           |                                             |                                                                                                                                                                                                                       |
| 20 |                                           |                                             |                                                                                                                                                                                                                       |
| 21 | A                                         | Knowledge & Beliefs about the Intervention  | Individuals' attitudes toward and value placed on the intervention as well as familiarity with facts, truths, and principles related to the intervention.                                                             |
| 22 |                                           |                                             |                                                                                                                                                                                                                       |
| 23 |                                           |                                             |                                                                                                                                                                                                                       |
| 24 |                                           |                                             |                                                                                                                                                                                                                       |
| 25 |                                           |                                             |                                                                                                                                                                                                                       |
| 26 | B                                         | Self-efficacy                               | Individual belief in their own capabilities to execute courses of action to achieve implementation goals.                                                                                                             |
| 27 |                                           |                                             |                                                                                                                                                                                                                       |
| 28 |                                           |                                             |                                                                                                                                                                                                                       |
| 29 | C                                         | Individual Stage of Change                  | Characterization of the phase an individual is in, as he or she progresses toward skilled, enthusiastic, and sustained use of the intervention.                                                                       |
| 30 |                                           |                                             |                                                                                                                                                                                                                       |
| 31 |                                           |                                             |                                                                                                                                                                                                                       |
| 32 |                                           |                                             |                                                                                                                                                                                                                       |
| 33 |                                           |                                             |                                                                                                                                                                                                                       |
| 34 | D                                         | Individual Identification with Organization | A broad construct related to how individuals perceive the organization, and their relationship and degree of commitment with that organization.                                                                       |
| 35 |                                           |                                             |                                                                                                                                                                                                                       |
| 36 |                                           |                                             |                                                                                                                                                                                                                       |
| 37 |                                           |                                             |                                                                                                                                                                                                                       |
| 38 |                                           |                                             |                                                                                                                                                                                                                       |
| 39 | E                                         | Other Personal Attributes                   | A broad construct to include other personal traits such as tolerance of ambiguity, intellectual ability, motivation, values, competence, capacity, and learning style.                                                |
| 40 |                                           |                                             |                                                                                                                                                                                                                       |
| 41 |                                           |                                             |                                                                                                                                                                                                                       |
| 42 |                                           |                                             |                                                                                                                                                                                                                       |
| 43 |                                           |                                             |                                                                                                                                                                                                                       |
| 44 | <b>V. PROCESS</b>                         |                                             |                                                                                                                                                                                                                       |
| 45 | A                                         | Planning                                    | The degree to which a scheme or method of behavior and tasks for implementing an intervention are developed in advance, and the quality of those schemes or methods.                                                  |
| 46 |                                           |                                             |                                                                                                                                                                                                                       |
| 47 |                                           |                                             |                                                                                                                                                                                                                       |
| 48 |                                           |                                             |                                                                                                                                                                                                                       |
| 49 |                                           |                                             |                                                                                                                                                                                                                       |
| 50 | B                                         | Engaging                                    | Attracting and involving appropriate individuals in the implementation and use of the intervention through a combined strategy of social marketing, education, role modeling, training, and other similar activities. |
| 51 |                                           |                                             |                                                                                                                                                                                                                       |
| 52 |                                           |                                             |                                                                                                                                                                                                                       |
| 53 |                                           |                                             |                                                                                                                                                                                                                       |
| 54 |                                           |                                             |                                                                                                                                                                                                                       |
| 55 |                                           |                                             |                                                                                                                                                                                                                       |
| 56 | 1                                         | Opinion Leaders                             | Individuals in an organization who have formal or informal influence on the attitudes and beliefs of their colleagues with respect to implementing the intervention.                                                  |
| 57 |                                           |                                             |                                                                                                                                                                                                                       |
| 58 |                                           |                                             |                                                                                                                                                                                                                       |
| 59 |                                           |                                             |                                                                                                                                                                                                                       |
| 60 |                                           |                                             |                                                                                                                                                                                                                       |

|   |                                                    |                                                                                                                                                                                                                       |
|---|----------------------------------------------------|-----------------------------------------------------------------------------------------------------------------------------------------------------------------------------------------------------------------------|
| 2 | Formally Appointed Internal Implementation Leaders | Individuals from within the organization who have been formally appointed with responsibility for implementing an intervention as coordinator, project manager, team leader, or other similar role.                   |
| 3 | Champions                                          | "Individuals who dedicate themselves to supporting, marketing, and 'driving through' an [implementation]" [101] (p. 182), overcoming indifference or resistance that the intervention may provoke in an organization. |
| 4 | External Change Agents                             | Individuals who are affiliated with an outside entity who formally influence or facilitate intervention decisions in a desirable direction.                                                                           |
| C | Executing                                          | Carrying out or accomplishing the implementation according to plan.                                                                                                                                                   |
| D | Reflecting & Evaluating                            | Quantitative and qualitative feedback about the progress and quality of implementation accompanied with regular personal and team debriefing about progress and experience.                                           |
